# 1 Phosphoprotein-based Biomarkers as Predictors for Cancer Therapy

2 **Authors:** Angela M. Carter<sup>1</sup>, Chunfeng Tan<sup>2</sup>, Karine Pozo<sup>3,4</sup>, Rahul Telange<sup>1</sup>, Roberto Molinaro<sup>5,6</sup>, Ailan  
3 Guo<sup>7</sup>, Enrica De Rosa<sup>5,8</sup>, Jonathan O. Martinez<sup>5</sup>, Shanrong Zhang<sup>9</sup>, Nilesh Kumar<sup>10</sup>, Masaya Takahashi<sup>9</sup>,  
4 Thorsten Wiederhold<sup>11</sup>, Hans K. Ghayee<sup>12</sup>, Sarah C. Oltmann<sup>4,21</sup>, Karel Pacak<sup>13</sup>, Eugene A. Woltering<sup>14</sup>,  
5 Kimmo J. Hatanpaa<sup>15</sup>, Fiemu E. Nwariaku<sup>4,21</sup>, Elizabeth G. Grubbs<sup>16</sup>, Anthony J Gill<sup>17</sup>, Bruce Robinson<sup>18</sup>,  
6 Frank Gillardon<sup>19</sup>, Sushanth Reddy<sup>1,22</sup>, Renata Jaskula-Sztul<sup>1,22</sup>, James A. Mobley<sup>20</sup>, M. Shahid Mukhtar<sup>1,10</sup>,  
7 Ennio Tasciotti<sup>5,23</sup>, Herbert Chen<sup>1,22</sup>, James A. Bibb<sup>1,22\*</sup>.

## 8 **Affiliations:**

9 <sup>1</sup>Department of Surgery, University of Alabama at Birmingham, Birmingham, AL 35233, USA.

10 <sup>2</sup>Department of Psychiatry, University of Texas Southwestern Medical Center, Dallas, TX 75390, USA.

11 <sup>3</sup>Department of Neuroscience, University of Texas Southwestern Medical Center, Dallas, TX 75390, USA.

12 <sup>4</sup>Department of Surgery, University of Texas Southwestern Medical Center, Dallas, TX 75390, USA.

13 <sup>5</sup>Regenerative Medicine Program, Houston Methodist Research Institute, Houston, TX 77030, USA.

14 <sup>6</sup>Department of Biomolecular Sciences, University of Urbino Carlo Bo, 61029, Urbino, Italy.

15 <sup>7</sup>Bluefin Biomedicine, Beverly, MA 01915, USA.

16 <sup>8</sup>Department of Nanomedicine, Houston Methodist Research Institute, Houston, TX 77030, USA

17 <sup>9</sup>Advanced Imaging Research Center, University of Texas Southwestern Medical Center, Dallas, TX 75390,  
18 USA.

19 <sup>10</sup>Department of Biology, University of Alabama at Birmingham, Birmingham, AL 35233, USA.

20 <sup>11</sup>Cell Signaling Technology, Danvers, MA 01923, USA.

21 <sup>12</sup> Department of Internal Medicine, Division of Endocrinology, University of Florida College of Medicine  
22 and Malcom Randall VA Medical Center, Gainesville, FL 32608, USA

23 <sup>13</sup>Section on Medical Neuroendocrinology, Eunice Kennedy Shriver National Institute of Child Health and  
24 Human Development, National Institutes of Health, Bethesda, MD 20892, USA.

25 <sup>14</sup>Department of Surgery, Louisiana State University Health Sciences Center, New Orleans, LA 70112,  
26 USA.

27 <sup>15</sup>Department of Pathology, University of Texas Southwestern Medical Center, Dallas, TX 75390, USA.

28 <sup>16</sup>Department of Surgical Oncology, University of Texas MD Anderson Medical Center, Houston, TX  
29 77030, USA

30 <sup>17</sup>Cancer Diagnosis and Pathology Group, Kolling Institute of Medical Research, University of Sydney, St  
31 Leonards 2065, Australia

32 <sup>18</sup>Kolling Institute and Department of Endocrinology, Royal North Shore Hospital, University of Sydney, St  
33 Leonards 2065, Australia

34 <sup>19</sup>Boehringer Ingelheim Pharma GmbH & Co. KG, CNS Diseases Research, Birkendorferstrasse 65, 88397  
35 Biberach an der Riss, Germany.

36 <sup>20</sup>Department of Anesthesiology and Perioperative Medicine, University of Alabama at Birmingham,  
37 Birmingham, AL 35233, USA.

38 <sup>21</sup>Harrold B. Simmons Comprehensive Cancer Center, University of Texas Southwestern Medical Center,  
39 Dallas, TX 75390, USA.

40 <sup>22</sup>O'Neal Comprehensive Cancer Center, Alabama at Birmingham, Birmingham, AL 35233, USA.

41 <sup>23</sup>Houston Methodist Orthopedic and Sports Medicine, Houston Methodist Hospital, Houston, TX 77030  
42 USA

44 \*Correspondence to: [jbibb@uab.edu](mailto:jbibb@uab.edu)

45

## 46 **Abstract**

47 Disparities in cancer patient responses have prompted widespread searches to identify differences in  
48 sensitive vs. non-sensitive populations and form the basis of personalized medicine. This customized  
49 approach is dependent upon the development of pathway-specific therapeutics in conjunction with  
50 biomarkers that predict patient responses. Here, we show that Cdk5 drives growth in subgroups of human  
51 patients with multiple types of neuroendocrine neoplasms. Phosphoproteomics and high throughput  
52 screening identified novel phosphorylation sites downstream of Cdk5. These phosphorylation events serve as  
53 biomarkers of Cdk5 activity and effectively pinpoint Cdk5-driven tumors. Toward achieving targeted  
54 therapy, we demonstrate that mouse models of neuroendocrine cancer are responsive to selective Cdk5  
55 inhibitors and biomimetic nanoparticles are effective vehicles for enhanced tumor targeting and reduction of  
56 drug toxicity. Finally, we show that biomarkers of Cdk5-dependent tumors effectively predict response to  
57 anti-Cdk5 therapy in patient-derived xenografts. Thus, a phosphoprotein-based diagnostic assay combined  
58 with Cdk5-targeted therapy is a rational treatment approach for neuroendocrine malignancies.

59

## 60 **Text**

61 Cyclin dependent kinases (Cdks) are a family of proline-directed serine/threonine kinases that are  
62 required for progression of normal cell division. Typical Cdks are regulated through binding to cyclins,  
63 proteins which are expressed at varying levels at distinct stages of the cell cycle<sup>1</sup>. As master regulators of cell  
64 division, Cdk1/2/4/6 currently serve as popular targets for cancer therapy development<sup>2-4</sup>. Although Cdk5  
65 shares ~60% sequence identity with founding family members Cdk1 and Cdk2<sup>5</sup>, it possesses non-canonical  
66 features. Specifically, Cdk5 is not required for normal cell cycle progression and is not activated by cyclins.  
67 Cdk5 is regulated instead through interactions with cofactors p35 and p39<sup>6</sup>. Although Cdk5 is expressed in a  
68 broad number of tissues<sup>5</sup>, its activators are mostly restricted to neuronal cells<sup>7</sup> where Cdk5 activity is

69 important for CNS development and cognitive processes such as learning and memory<sup>8</sup>. Cleavage of p35 and  
70 p39 by calpain produces truncated activators, p25 and p29, respectively<sup>9</sup>. These cleavage products have  
71 increased protein stability and mislocalize in cells due to removal of an N-terminal myristoylation site<sup>10</sup>. In  
72 neurons, p25 aberrantly activates Cdk5 and has been linked to neurotoxicity, neuronal injury, and  
73 neurodegeneration<sup>6</sup>.

74 Recent research suggests the aberrant activation of Cdk5 in non-neuronal cells can usurp signaling  
75 components involved in the cell cycle to drive proliferation<sup>11</sup>. Expression of Cdk5 and p35/p25 has been  
76 shown for three types of neoplasms originating from neuroendocrine (NE) cells: medullary thyroid  
77 carcinoma (MTC)<sup>12</sup>, small cell lung cancer (SCLC)<sup>13</sup>, and pituitary adenomas<sup>14</sup>. In MTC, inhibition of Cdk5  
78 activity decreases rates of cell growth<sup>12,15</sup>; in SCLC and pituitary adenomas, it decreases migration and  
79 invasion<sup>16,17</sup>. Expression of p25 in thyroid C-cells produces MTC in mice<sup>12</sup>, in part through alteration of  
80 traditional cell cycle regulatory components<sup>18</sup>. Here we show that Cdk5 and p35/p25 expression may be an  
81 important driver of many types of NE cancer and that aberrant Cdk5 activity allows for a diagnostic-coupled  
82 treatment strategy that targets this protein kinase.

### 83 **Cdk5 in NE Neoplasms**

84 To better understand the potential role of Cdk5 across multiple forms of NE malignancies, we assessed  
85 expression of the kinase and its activating cofactors in different NE tumor and cancer types. Histological  
86 analysis demonstrated that Cdk5 and p35/p25 are present throughout various human NE neoplasms including  
87 MTC, pheochromocytoma (PHEO), pituitary adenoma, SCLC, pancreatic NE tumors, and gastrointestinal NE  
88 tumors (Fig. 1a). Furthermore, these proteins are present in cell lines derived from multiple types of NE  
89 neoplasms, including three human MTCs (TT, MTC-SK, and SIN-J), a human progenitor PHEO (hPheo1)<sup>19</sup>, a  
90 human pancreatic carcinoid (BON), a rat insulinoma (INS), and two human SCLCs (H146 and H1184, Fig.  
91 1b). Selective Cdk5 inhibition by Indolinone A (Indo A) blocked all human NE cancer cell growth more  
92 potently than it affected normal human fibroblasts or rat INS cells (Fig. 1c and Ext. Data Fig. 1a-h).  
93 Interestingly, the aberrant Cdk5 activator, p25, was present in all human cell lines derived from naturally

94 occurring tumors but not the rat line generated using irradiation<sup>20</sup> (Fig. 1b). Cells treated with Cdk5 inhibitors  
95 typically showed flattening and smoothing of cell body consistent with a less malignant phenotype (Fig. 1d).

96 Indo A inhibits Cdk5 activity with high affinity, but also affects Cdk4<sup>21</sup>. Importantly, the structurally  
97 related Cdk4-specific inhibitor, Indo B, was 6.4-15.4 fold less potent at preventing human NE cell proliferation  
98 (Fig. 1c and Ext Data Fig. 1a-h). Growth of multiple NE cancer cell lines was likewise blocked by the broad  
99 spectrum Cdk inhibitors Roscovitine and Dinaciclib. CP681301, a selective inhibitor of both Cdk2 and Cdk5,  
100 also blocked growth of NE cancer cells whereas the Cdk2 specific inhibitor CVT313 had a greatly reduced  
101 effect (Ext. Data Fig. 1i-l). Thus, Cdk5 inhibition was necessary to robustly inhibit proliferation of cells derived  
102 from multiple forms of NE neoplasms. These data indicate that Cdk5 and p35/25 expression characterize at  
103 least a portion of all NE neoplasms and aberrant Cdk5 activity is a major contributor to the growth of NE  
104 cancer cells.

### 105 **Downstream targets of Cdk5**

106 To determine which pathways Cdk5 may target to drive NE cell proliferation, we used a unique bi-  
107 transgenic mouse model of MTC (NSE-p25OE mice), developed in our laboratory, in which tumors arise at  
108 the natural organ site in the presence of an intact immune system. These mice express an activator of Cdk5,  
109 p25-GFP, in C-cells of the thyroid under the control of a doxycycline (dox) regulatable promotor (Fig. 2a)<sup>12</sup>.  
110 This system can be used to generate actively growing MTC tumors through expression of p25-GFP as well  
111 as growth-arrested MTC tumors through initial expression and subsequent suppression of p25-GFP via re-  
112 administration of dox (Fig. 2b-c). As C-cells only comprise 3% of a normal thyroid, this system allows  
113 generation of sufficient quantities of C-cells for direct comparison of the signaling state between dividing  
114 and non-dividing populations.

115 Phosphoproteomic analysis of growing versus arrested MTC tumors, using PhosphoScan technology<sup>22</sup>,  
116 revealed global differences in the proline directed S/T phospho-signaling network including over 250  
117 peptides with elevated phosphorylation levels in growing tumors (Fig. 2d and Ext. Data Table 1). From this  
118 set of phosphorylation sites, those not conserved in humans or conforming to a stringent Cdk5

119 phosphorylation sequence (S/T-P-x-K/H/R) were eliminated. From the remaining proteins, 50 of the most  
120 highly upregulated phosphorylation sites, with preference for those with established or suggested roles in  
121 cancer, were selected for investigation as potential tumorigenic regulators (Ext. Data Table 2). Short  
122 interfering peptides (SIPs) containing the phosphorylation site flanked by 8 amino acids on both the N- and  
123 C-terminal sides were designed to selectively interfere with phosphorylation or function of the 50 targets. A  
124 cell penetrating sequence (RQIKIWFQNRRMKWKK) from penetratin (PEN) was added to the N-terminus  
125 of peptides to facilitate entry into cells. A high-throughput proliferation-based assay identified 15 SIPs that  
126 inhibited growth of NE cancer cells but not normal primary fibroblasts (Fig. 2e-f and Ext. Data Table 2),  
127 indicating that these novel sites were important for NE cancer cell growth.

128 We performed Ingenuity Pathway Analysis (IPA) to ascertain major signaling cascades and pathways  
129 that are associated with these 15 proteins. Among the predicted 25 statistically enriched canonical pathways,  
130 cell cycle regulation, DNA repair, and diverse cancer signaling pathways are a predominant feature (Fig. 2f  
131 and Ext. Data Table 3). Thus, the downstream targets identified here are associated with common cancer  
132 mechanisms.

### 133 **Biomarkers of Cdk5 activity**

134 Phosphorylation state-specific antibodies were generated for detection of 6 novel sites (Ser608 ASXL2,  
135 Thr143 FAM53C, Thr709 FLNB, Thr202 LARP6, Ser110 KNL2, and Ser988 RBL1) and two sites  
136 previously identified as targets of Cdk2 (Ser17 H1B<sup>23,24</sup> and Ser391 SUV39H1<sup>25</sup>) (Ext. Data Fig. 2).  
137 Phosphorylation of these sites, as well as the thoroughly established Ser807/Ser811 sites on RB<sup>26,27</sup>, was  
138 confirmed in mouse MTC tumors, in which growth was driven by expression of p25-GFP, and reduced in  
139 arrested tumors (Fig. 3a). In agreement, phosphorylation levels of 6 of these sites were dose-dependently  
140 decreased by the Cdk4/5 inhibitor Indo A in hPheo1 cells (Fig. 3b). Similar decreases in these  
141 phosphorylation sites were observed in human MTC-SK, TT, and BON cells (Ext. Data Fig. 3). This effect  
142 appeared Cdk5-specific as addition of the Cdk4 inhibitor Indo B to multiple NE cell lines had significantly  
143 less effect on the phosphorylation states of Thr143 FAM53C, Thr709 FLNB, Ser17 H1B, and Thr202

144 LARP6 compared to Indo A. In contrast, phosphorylation of Ser807/Ser811 RB, a known target of multiple  
145 Cdk5, was decreased upon treatment with both inhibitors. Interestingly, the phosphorylation of the RB family  
146 member, RBL1, was more responsive to Indo A than Indo B in TT cells whereas phosphorylation of Ser391  
147 SUV39H1 was more responsive to Indo A than Indo B in BON cells (Ext. Data Fig. 3). Overall, these data  
148 demonstrate that phosphorylation of these 6 proteins is dependent upon Cdk5 activity and suggests that these  
149 phosphorylation sites could serve as biomarkers of many types of Cdk5-driven NE tumors.

150 To determine if these Cdk5-dependent biomarkers occurred in human NE tumors, cohorts of MTC  
151 patient tumors and normal human thyroid tissues were compared. Immunoblot analysis revealed that three of  
152 the phosphorylation sites, Ser17 H1B, Thr202 LARP6, and Ser988 RBL1, were significantly elevated in the  
153 total tumor population and exhibited a positive correlation with overall Cdk5 expression levels (Fig. 3c and  
154 Ext. Data Fig. 4). The phosphorylation state of Ser391 SUV39H1 was only increased in a small portion of  
155 tumor samples but retained a positive correlation with Cdk5 expression. Distribution of all four phospho-  
156 sites varied across patients with phospho-LARP6 being the most commonly detected followed by  
157 phosphorylation of H1B and RBL1, respectively (Fig. 3d). Although 73% of patient tumors exhibited  
158 elevated Cdk5 levels, only 21% presented with elevation of all four biomarkers of Cdk5 pathway activity,  
159 emphasizing the fact that presence of a protein does not correlate 100% with function of that protein and  
160 highlighting the need for direct readouts of pathway activity such as phosphorylation of downstream  
161 substrates. Thus, Cdk5-dependent tumorigenic signaling may be considered patient-specific. Furthermore,  
162 detection of all four biomarkers in a patient could predict positive response to a Cdk5-targeted therapeutic  
163 approach.

#### 164 **Cdk5 inhibitors as effective therapeutics in NE models.**

165 To evaluate the efficacy of anti-Cdk5 therapy when administered systemically, multiple animal models  
166 of NE cancer were used. First, the transgenic model of MTC driven directly by activation of Cdk5, NSE-  
167 p25OE, (Fig. 4a-b) was treated with vehicle or Indo A (10-30 mg/kg body weight, BW) once every three  
168 days for two weeks. Tumor growth was significantly reduced by 20 and 30 mg/kg of Indo A compared to

169 control animals. Plasma levels of CEA, a marker of MTC<sup>28</sup>, were also reduced in treated animals, indicating  
170 therapeutic efficacy (Fig. 4c). As a second model, TT cells derived from a familial case of human MTC were  
171 used to generate xenograft tumors in nude mice. As with the transgenic model, Indo A attenuated TT cell  
172 tumor progression (Fig. 4d-e). While CEA was not detected in the plasma of these animals, levels of  
173 chromogranin A (ChA), another marker of MTC<sup>29</sup>, were reduced (Fig. 4f). Thus, Cdk5 inhibition blocks the  
174 growth of tumors in distinct models of MTC. The efficacy of Indo A was also assessed in a xenograft tumor  
175 model generated from human pancreatic NE tumor derived BON cells (Ext. Data Fig. 5). Indo A was equally  
176 effective in impeding the growth of these tumors, suggesting that targeted Cdk5 therapy could be effective  
177 across multiple NE cancer types.

### 178 **Biomarkers are predictive of response to anti-Cdk5 therapy**

179 We hypothesized that the phosphorylation states of a newly identified set of proteins could serve as  
180 biomarkers of Cdk5-driven tumors. If true, biomarker positive tumors should be responsive to Cdk5 inhibitor  
181 therapy while biomarker negative tumors should be non-responsive. To test this, a cohort of tumors from  
182 patient-derived xenograft (PDX) models of mixed origins was analyzed quantitatively for the presence of NE  
183 markers, Cdk5 pathway components, and putative Cdk5-dependent biomarkers (Fig. 4g). A Large Cell NE  
184 Carcinoma (LCNEC) model was identified that exhibited NE markers, expressed Cdk5 and high levels of its  
185 activators, and the 4 biomarkers. In contrast, a Merkel cell model (Merkel 2) was identified that expressed  
186 NE markers, but low Cdk5 pathway components, and low biomarker levels. Cohorts of these two disparate  
187 PDX models were then treated with Indo A (20 mg/kg) and tumor progression was assessed (Fig. 4h-i).  
188 Growth of the biomarker positive LCNEC model was significantly reduced whereas growth of the biomarker  
189 negative Merkel 2 model was not. These data support the ability of these biomarkers to predict  
190 responsiveness to anti-Cdk5 therapy.

### 191 **Enhanced drug delivery method**

192 Although transgenic MTC mouse model animals responded favorably to Indo A treatments, tumor  
193 regression was not observed. Efforts to test higher doses of Indo A for increased potency were not feasible as

194 cohorts receiving 30 mg/kg BW experienced 50% mortality while both 20 and 30 mg/kg treated cohorts  
195 evidenced some level of liver or kidney toxicity (Fig. 4n-o). To deliver Indo A selectively to tumors and  
196 thereby circumvent toxicity issues, we tested a biomimetic nanoparticle-based drug delivery system,  
197 leukosomes (LKs), generated from a combination of synthetic phospholipids and leukocyte membrane  
198 extracts<sup>30,31</sup>. Traditional nanoparticle delivery systems are dependent upon passive targeting through  
199 enhanced permeability and retention (EPR) of unhealthy tumor vasculature<sup>32</sup>. Although still benefiting from  
200 EPR, LKs actively target activated endothelium via mechanisms analogous to those utilized by white blood  
201 cells<sup>33</sup>. Importantly, LKs are successfully camouflaged by leukocyte membrane proteins leading to lower  
202 total opsonization and avoidance of the rapid immune clearance observed with purely synthetic nanoparticle  
203 platforms<sup>34-36</sup>.

204 As tumors are generally highly inflamed, we tested the ability of LKs to traffic to MTC tumors of NSE-  
205 p25OE mice and to stabilize lower doses of Indo A. Using intravital microscopy, LKs were verified to  
206 exhibit increased tumor localization compared to control liposomes and to time-dependently spread from the  
207 vasculature into surrounding tumor tissue (Fig. 4j-k). Maximum encapsulation of Indo A into LKs had no  
208 deleterious effects on particle size or homogeneity (Ext. Data Fig. 6) and allowed a dosage of 5 mg/kg BW  
209 Indo A per retro-orbital injection. HPLC/MS analysis of blood plasma demonstrated a 6-fold stabilization of  
210 encapsulated drug compared to free drug at these lower dosage levels (Fig. 4l).

211 Indo A delivered at 10 mg/kg BW in the free form had no effect on tumor growth in transgenic MTC  
212 animals (Fig. 4b). In contrast, delivering only 5 mg/kg BW Indo A encapsulated in LKs had the same effect  
213 as delivering 20 mg/kg BW free drug (Figs. 4b and 4m). Thus, the LK delivery system generated an  
214 equivalent effect utilizing a 75% lower dosage. LKs also protected animals against hepatic and renal toxicity  
215 (Fig. 4n-o). While complete tumor arrest or shrinkage was not observed at 5 mg/kg BW, further  
216 modifications to allow higher encapsulation of drug could provide additional benefit for this unique delivery  
217 approach.



## 218 **Discussion**

219 The development of advanced sequencing techniques has led to an explosion of information pertaining  
220 to the genomic landscape of cancer. In some cases, this information successfully progressed to the  
221 development of personalized medicine. For example, mutations at Val600 in the serine/threonine kinase B-  
222 Raf are predictive of response to B-Raf inhibitors in patients with metastatic melanoma<sup>37,38</sup>. However, the  
223 majority of B-Raf mutant papillary thyroid cancer and colon cancer patients do not respond to B-Raf targeted  
224 inhibitors<sup>39</sup>, emphasizing the difficulty designing treatment options based on single gene mutations.

225 For NE neoplasms, mutations are prominent in genes encoding the scaffolding protein menin and the  
226 receptor tyrosine kinase RET. Menin mutations were initially identified over 20 years ago in patients with  
227 multiple endocrine neoplasia (MEN) type 1 syndrome<sup>40,41</sup>. Menin is a broadly expressed tumor suppressor in  
228 which mutations typically cause protein truncation<sup>42,43</sup>. Currently there are no therapeutics with the potential  
229 to circumvent these mutations.

230 Mutations in the proto-oncogene RET were discovered over 20 years ago in patients with MEN2  
231 syndrome<sup>44-46</sup>. The development of vandetanib and carbozantinib, tyrosine kinase inhibitors that target RET,  
232 generated hope that patients possessing RET mutations could be successfully treated. Unfortunately, human  
233 trials revealed no correlation between the presence of a RET mutation and patient response to therapy<sup>47-49</sup>.

234 As with all cancers, many mutations, in addition to RET, are present within each MTC cancer cell.  
235 These additional mutations can alter the diverse input nodes of the signaling network that drive cancer cell  
236 growth and survival. For these reasons, looking at the signaling network with a broader lens that includes  
237 post-translational modifications could be beneficial and aid in the elimination of “false positive” non-  
238 responders that would be predicted responders from genomic or proteomic information alone. By assessing  
239 signaling states across a network of pathways, such an approach might also allow for more accurate stage-  
240 dependent therapeutic assessments to be made for individual patients. The current study reveals that Cdk5 is  
241 likely a contributor to at least a portion all NE tumor types. It also identifies a set of phosphorylation-based

242 biomarkers which indicate that not only are Cdk5 pathway components present, but Cdk5 is actively  
243 modulating the signaling network and regulating cancer physiology.

244 In addition to being biomarkers of Cdk5 pathway activity, the phosphoproteins identified in this study  
245 are potentially directly involved in promotion of cell growth and/or survival. For example, RBL1 is a  
246 member of the retinoblastoma (RB) family of proteins that includes the tumor suppressor RB and RBL2. The  
247 RB family plays a major role in cell cycle regulation and is also involved in modulating senescence,  
248 apoptosis, and chromosomal stability<sup>27</sup>. Although functional compensation has been observed among the  
249 family members, some differences exist. Unlike RB, RBL1 and RBL2 do not bind to activating transcription  
250 factors E2F1-3. They interact instead with transcriptional repressors E2F4 and E2F5<sup>50-52</sup>. Remarkably, both  
251 RBL1 and RBL2, but not RB, are members of the DREAM complex, a regulatory unit that mediates cell  
252 entry into quiescence<sup>53,54</sup>.

253 Emerging information suggests Cdk5 may play a role in non-NE cancer as well<sup>11</sup>. As the heterogeneity  
254 between tumors of the same cancer type is becoming more apparent, the likelihood that treatment approaches  
255 will evolve based on individual tumor signaling states instead of general tumor type classification is  
256 increasing. The biomarkers identified in this study are not limited to use for NE cancer patients. Indeed, the  
257 Ovarian and PDAC PDX models analyzed here, both non-NE, exhibit high levels of NE features as well as  
258 biomarkers of Cdk5 pathway activation. A broader survey of PDX models for these novel biomarkers  
259 coupled with pre-clinical Cdk5 inhibitor testing could delineate finite cut-offs for classification of multiple  
260 forms of cancer as predicted responders for Cdk5-targeted therapy.

261

## 262 **Methods**

263 **Animal Research.** All animal work was performed in accordance with the guidelines of the Animal Welfare  
264 Act and the Guide for the Care and Use of Laboratory Animals under approved protocols by UTSW, UAB,  
265 and HMRI Institutional Animal Care and Use Committees.

266 **Antibody production and purification.** Phosphopeptides (SIT\*SPNRTGC-ASXL2, CAPSKLW\*TPIKH-  
267 FAM53C, CSY\*TPVKAIK-FLNB, CAPVEK\*SPAK-H1B, CANYE\*SPGKI-KNL2, CALA\*TPQKNG-  
268 LARP6, CSIYI\*SPHKN-RBL1, CAGLPG\*SPKK-SUV39H1; \* indicates a phosphorylated residue) were  
269 conjugated to *Limulus polyphemus* hemocyanin (Sigma H1757), emulsified with Freund's adjuvant (Sigma  
270 F5881 or F5506), and injected subcutaneously into New Zealand White rabbits (Charles River Laboratories).  
271 Rabbits were boosted once and blood collected twice over a 5 week period for 12 months. Blood was  
272 allowed to clot at 4 °C for 24 h, centrifuged at 1000 g, and plasma isolated and stored at -20°C.

273 Phosphorylation state-specific antibodies were purified from plasma using phosphopeptide affinity columns  
274 by elution with 100 mM Glycine pH 2.5 into 1 M Tris pH 8.6 (11:1 volume ratio, final 80 mM Tris pH ~7.5).  
275 Antibodies were dialyzed into 50 mM Tris pH 7.6 plus 150 mM NaCl and stored at -20°C.

276 **Cell culture and assays.** All cells were tested and verified to be free of mycoplasma contamination. Cell  
277 lines were probed for NE markers to verify identity. Cells were cultured at 37°C and 5% CO<sub>2</sub> in a humidified  
278 incubator. Fibroblasts were cultured in DMEM with 10% FBS. TT, MTC-SK, and SIN-J cells were cultured  
279 in Ham's F12:Medium 199 (1:1) with 10% FBS. hPheo1, H146, and H1184 cells were cultured in RPMI  
280 with 10% FBS, 1 mM Na-pyruvate, and 10 mM HEPES. BON cells were cultured in DMEM: Ham's F12  
281 (1:1) with 10% FBS. INS cells were cultured in RPMI with 10% FBS, 1 mM Na-pyruvate, 10 mM HEPES,  
282 4.5 g/L glucose, and 50 µM β-ME. TT-RLuc cells were cultured in RPMI with 20% FBS, 100 µg/ml  
283 penicillin, and 100 µg/ml streptomycin. *Growth assays.* Cells were seeded onto a black 96-well plates with a  
284 clear optical bottom and allowed to recover overnight. Growth of hPheo1 cells was measured 2 days after  
285 inhibitor treatment and growth of Fibro, TT, MTC-SK, BON, INS, and H146 cells was measured 6 days after  
286 inhibitor treatment using Cyquant Direct Proliferation Assay (Invitrogen) and an Optima Fluostar plate  
287 reader (BMG LabTech). For SIP experiments, cells received two SIP treatments per experiment. Growth of  
288 BON and hPheo1 cells was measured 2 days after initial SIP treatment and growth of Fibro and MTC-SK  
289 cells was measured 6 days after initial SIP treatment using procedures described above.

290 *Immunoblot analysis.* Cells were seeded onto 6 well dishes and allowed to recover overnight. Cells were  
291 treated for 4 h with inhibitors and then lysed in 50 mM NaF and 1% SDS with brief sonication. Samples  
292 were diluted to equivalent total protein concentrations in 1X Laemmli buffer and separated by SDS-PAGE.  
293 Proteins were transferred onto nitrocellulose for immunoblotting utilizing in-house phosphorylation state-  
294 specific antibodies, anti-Cdk5 (sc-173), anti-p35 (sc-820), anti-GAPDH (Sigma G8795), anti-actin (Abcam  
295 ab6276), anti-ASXL2 (Abcam ab106540, Sigma sab1407639), anti-Fam53C (Abcam 105679), anti-FLNB  
296 (Abnova PAB30702), anti-H1B (sc-247158), anti-KNL2 (sc-162587), anti- RBL (sc-318-G), anti-LARP6  
297 (Sigma sab1407657), and anti-SUV39H1 (Sigma S8316). Anti-goat, -rabbit, and –mouse secondary  
298 antibodies conjugated to either IRdye 680RD or IRdye 800CW (LiCor) were used for detection on a LiCor  
299 Odessey CLx. Actin and GAPDH were used as sample processing controls. Other total proteins were probed  
300 on the same membrane as phosphoproteins unless antibody conditions did not allow.

301 **Human tissue analysis.** *Collection.* Human tissues were collected with patient consent and in accordance  
302 with institutional review board (IRB) regulations. Samples were collected under University of Wisconsin  
303 Madison IRB 2011-0145, MD Anderson IRB PA11-0744, University of Texas Southwestern Medical Center  
304 IRB STU102010-042 and STU102010-051, NICHD IRB 00-CH-0093, Louisiana State University IRB 5774,  
305 and University of Sydney LNR/13/HAWKE/424 - 1312-417M.

306 *Histology.* Formalin-fixed, paraffin-embedded samples were cut into 5  $\mu$ m sections, deparaffinized, and  
307 subjected to microwave antigen retrieval (citrate buffer, pH 6.0). Sections were then stained using standard  
308 protocols for H&E or immunostained with antibodies recognizing p35/p25 (sc-820, Santa Cruz  
309 Biotechnology) or Cdk5 (308-Cdk5, PhosphoSolutions). For immunostaining, sections were permeabilized  
310 with 0.3% Triton X-100, quenched free of endogenous peroxidases, and blocked with 2.5% normal goat  
311 serum prior to overnight incubation with primary antibodies at 4 °C. Bound primaries were detected by  
312 sequential incubation with biotinylated-secondary antisera, streptavidin-peroxidase (Vector Laboratories),  
313 and diaminobenzidine chromagen (DAKO) following the manufacturer's directions.

314 *Immunoblot analysis.* Tissues were crushed while frozen then lysed in 50 mM NaF and 1% SDS with brief  
315 sonication. Samples were diluted to equivalent total protein concentrations in 1X Laemmli buffer and  
316 separated by SDS-PAGE. Proteins were transferred onto nitrocellulose for immunoblotting as described  
317 above.

318 **Intravital Microscopy.** IVM was performed using an upright Nikon A1R laser scanning confocal  
319 microscope with a resonance scanner, motorized and heated stage, and Nikon long-working distance 4× and  
320 20× dry plan-apochromat objectives housed within the IVM Core at the HMRI. For imaging, NSE-p25OE  
321 mice were anesthetized with isoflurane and the ventral surface of the neck opened to expose the trachea,  
322 salivary glands, and MTC tumors. Tumors were positioned in direct contact with the coverslip, visualized  
323 using the GFP signal, and positions selected for imaging. After selection of positions, Cy5.5 labeled LKs and  
324 LPs were administered via retro-orbital injection and mice were imaged continuously for 2 hours using the  
325 4x objective. Images were quantified using Nikon Elements. The tumor accumulation reported was  
326 normalized by dividing the area occupied by LKs or LPs by the area occupied by the tumor within each  
327 image.

328 **LCMS2 Analysis of IndoA.** *Extraction.* Sera (25  $\mu$ L) were reconstituted in 25  $\mu$ L of extraction solution  
329 (25% acetonitrile/75% H<sub>2</sub>O), vortexed for 1 min, diluted with 25  $\mu$ L of 100% ACN, followed by two cycles  
330 of vortexing for 1 min and incubating at room temperature (RT) for 10 min. Samples were then diluted with  
331 200  $\mu$ L of 100% ACN, vortexed for 1 min, then stored at -20°C overnight. Samples were thawed at RT for  
332 ~10 min, centrifuged at 14,000 g for 10 min at 4°C to remove cell debris, then supernatants were transferred  
333 to 2 mL tinted glass vials and dried down to ~5-10  $\mu$ L under argon gas at 25°C for 25 min. Samples were  
334 immediately reconstituted (adjusted to 210  $\mu$ L) in 25% ACN/1% trifluoroacetic acid/74% H<sub>2</sub>O and  
335 centrifuged at 14,000 g for 10 min at 4°C to remove any residual debris. The supernatants were then  
336 transferred to tinted vials prior to analysis.

337 *LC/MS.* Analysis was performed on a Dionex Ultimate 3000 UHPLC+ Focused Stack & Auto Sampler  
338 (Thermo Fisher Scientific/Dionex) using a RP C18 Hypersil Gold (100mm I.D. x 4.6mm, 5  $\mu$ m 175Å pore

339 size; Thermo Fisher Scientific) in-line with an LTQXL mass spectrometer equipped with a heated  
340 electrospray ionization source (Thermo Fisher Scientific), and all data were collected in selective reaction  
341 monitoring (SRM) mode. The HPLC was configured with binary mobile phases that include solvent A (0.1%  
342 TFA/99.9% H<sub>2</sub>O), and solvent B (0.1% TFA/15% H<sub>2</sub>O/5% ACN). The gradient program steps were run in  
343 linear mode as follows; 0-6 min at 75%-50% B (200  $\mu$ L/min), 6-7 min at 50%-80% B (200  $\mu$ L/min), 7-  
344 11min at 80%-90% B (200  $\mu$ L/min), 11-12min at 90%-25% B (500  $\mu$ L/min), and finally 12-16min at 25%B  
345 (200  $\mu$ L/min). SRM mode was optimized using a parent ion window of 453.2 +/- 1.0 *m/z*, 20% normalized  
346 collision energy, activation energy at 0.240, activation time of 30 ms, with a daughter ion window of 306.5  
347 +/- 1.5 *m/z*. The resultant Xcalibur RAW files were collected in profile mode and the SRM base peak values  
348 processed and extracted using Xcalibur version 2.2 sp1.48.

349 **Leukosome synthesis and characterization.** LKs were developed as previously reported<sup>31</sup>. Briefly, 1,2-  
350 dipalmitoyl-*sn*-glycero-3-phosphocholine (DPPC) and 1,2-dioleoyl-*sn*-glycero-3-phosphocholine (DOPC)  
351 and cholesterol (Avanti Polar Lipids) (4:3:3 molar ratio) were dissolved in ethanol at a final lipid  
352 concentration of 9 mM and mixed with membrane proteins, previously resuspended in aqueous buffer at 1:50  
353 protein to-lipid concentrations, using the NanoAssemblr Benchtop platform (Precision NanoSystems, Inc.).  
354 Passive loading of Indo A within LKs was obtained by dissolving the drug in the ethanol mixture containing  
355 the lipids. Size and polydispersity index were determined through dynamic light scattering analysis using a  
356 Nanosizer ZS (Malvern Instruments). Surface charge (Zeta potential) was measured using a ZetaSizer Nano  
357 ZS (Malvern Instruments).

358 **Magnetic Resonance Imaging.** MRI conducted at UT Southwestern was performed using a 7-Tesla small  
359 animal MRI system (Agilent Inc.) with a 40 mm (i.d.) radio frequency (RF) coil and a 400mT/m gradient  
360 coil set. Animals were anesthetized by isoflurane and imaged in a supine position, head first with the thyroid  
361 centered with respect to the center of a RF coil. Two-dimensional (2D) fast spin-echo (FSE) images on three  
362 orthogonal planes (transverse, coronal and sagittal) were firstly acquired to ensure the position and the  
363 orientation of the thyroid tumors. For volume measurements of the thyroid tumors, the high resolution T<sub>2</sub>-

364 weighted FSE axial images was acquired. Major imaging parameters were: TR/TE = 2500/40 msec, FOV =  
365 25.6 x 25.6 mm, matrix size = 256 x 256, slice thickness = 1 mm, no gap, 8 averages, affording 100  $\mu$ m in-  
366 plane resolution.

367 **Phosphoproteomics. Peptide preparation.** Mouse tumors were homogenized in 8 M urea lysis buffer (20  
368 mM HEPES pH 8.0, 9 M urea, 1 mM sodium vanadate, 2.5 mM sodium pyrophosphate, 1 mM  $\beta$ -glycerol-  
369 phosphate), sonicated, then centrifuged for 15 min at 4 °C at 20,000 g. Supernatants were reduced with 4.5  
370 mM DTT for 30 min at 55°C followed by alkylation with 10 mM iodoacetamide. The samples were then  
371 digested with trypsin overnight at room temperature. Digests were acidified with 1% TFA and peptides  
372 desalted and purified over Sep-Pak C18 columns (Waters, WAT051910) using 40% acetonitrile in 0.1%  
373 TFA for elution. Elutes were lyophilized and stored at -80°C.

374 *Immunoaffinity purification (IAP) of peptides.* Lyophilized peptides were dissolved in IAP buffer (50 mM  
375 MOPS pH 7.2, 10 mM sodium phosphate, 50 mM NaCl), sonicated, and insoluble matter removed by  
376 centrifugation. CDK substrate motif antibody (Cell Signaling Technology #2324) and MAPK substrate motif  
377 antibody (Cell Signaling Technology #2325) was coupled to protein A beads (Roche). Immobilized antibody  
378 was incubated with peptide mixtures, immunoprecipitation was carried out at 4 °C overnight, then washed  
379 with IAP buffer, and eluted with 0.15% TFA. Eluates were further purified using C18 microtips (StageTips  
380 or Eppendorf C18 PerfectPure tips) with elution in 60% MeCN, 0.1% TFA then lyophilized.

381 *Analysis by LC-MS/MS.* Purified peptide mixtures were loaded onto a 10 cm x 75  $\mu$ m PicoFrit capillary  
382 column (New Objective) packed with Magic C18 AQ reversed-phase resin (Michrom Bioresources) using a  
383 Famos autosampler with an inert sample injection valve (Dionex). The column was developed with a 45-min  
384 gradient of acetonitrile in 0.125 % formic acid (Ultimate pump, Dionex), and tandem mass spectra were  
385 collected in a data-dependent manner with a Thermo Fisher Scientific LTQ ion trap mass spectrometer  
386 equipped with Electron Transfer Dissociation (ETD) module or with an Orbitrap mass spectrometer.

387 *Assigning peptide sequences using Sequest.* MS/MS spectra were evaluated using TurboSequest in the  
388 Sequest Browser package supplied as part of BioWorks 3.3 (Thermo Fisher Scientific). Searches were  
389 performed against the NCBI human protein database. Cysteine carboxamidomethylation was specified as a  
390 static modification and phosphorylation was allowed as a variable modification on serine and threonine.

391 **Preclinical Drug Testing.** A bi-transgenic mouse model of MTC was generated as previously described by  
392 crossing NSE-rTA and TetOp-p25GFP parental lines<sup>12</sup>. Bi-transgenic litters were monitored by MRI.  
393 Beginning at 10-40 mm<sup>3</sup> bilateral tumor volume, animals were treated once every 3 days by IP with vehicle  
394 (0.7% DMSO, 3.4% EtOH, 7.4% PEG400, 3.4% PG, 3.4% Kolliphor EL, 1.1% Tween 80 in 1X PBS), 10  
395 mg/kg, 20 mg/kg, or 30 mg/kg BW Indo A. Animals were monitored by MRI for 2 weeks then sacrificed 24  
396 h post-final injection by CO<sub>2</sub> euthanasia and cardiac perfusion with 0.1 mM Ammonium molybdate, 5 mM  
397 EGTA, 50 mM NaF, 2 mM Na orthovanadate, 10 mM Na pyrophosphate, and protease inhibitors (Sigma  
398 S8820) in PBS. Tissues were frozen or fixed in 4% PFA for 24 h and submitted for paraffin embedding.

399 Human BON and TT cell xenograft mouse models were generated by implanting 5e<sup>6</sup> BON or TT-RLuc cells  
400 subcutaneously in the NU/NU Nude Mouse (CrI:NU-Foxn1<sup>nu</sup>) strain from Jackson laboratories. Beginning at  
401 tumor volumes of 100-450 mm<sup>3</sup> (average starting sizes between groups varied less than 40mm<sup>3</sup>), animals  
402 were treated as described above and monitored by caliper measurement for 2 weeks. Animals were sacrificed  
403 and tissue processed as described above. All animals were randomly assigned to treatment groups but  
404 blinding was not possible.

405 **Scanning Electron Microscopy.** Cells were fixed on coverslips with 2.5% (v/v) glutaraldehyde in 0.1 M  
406 sodium cacodylate buffer overnight at 4 °C. After three rinses in 0.1 M sodium cacodylate buffer, they were  
407 post-fixed with 1% osmium tetroxide in 0.1 M sodium cacodylate buffer for 45 min. Cells were rinsed with  
408 water and dehydrated with increasing concentration of ethanol, followed by increasing concentrations of  
409 Hexamethyldisilazane in ethanol. Cells were air dried under the hood, mounted on SEM stubs and sputter



410 coated with gold palladium in a Cressington 108 auto sputter coater. Images were acquired on a Field-  
411 Emission Scanning Electron Microscope (Zeiss Sigma) at 3.00 kV accelerating voltage.

412 **Statistical Analysis.** Pre-clinical drug testing in animal models and accumulation of nanoparticles were  
413 analyzed by two-way ANOVA with repeated measures. All indications of significance are for the treatment  
414 group over the entire time period, not individual time points. Immunoblots containing >2 conditions, AST  
415 assays and Urea assays were analyzed by one-way ANOVA. Correlations in human tumor data were  
416 performed by Spearman rank-order analysis. Simple comparisons of two groups were performed using two-  
417 tailed Student's *t*-test. Sample sizes are provided with figure legends or in results. (\**p*<0.05, \*\**p*<0.01,  
418 \*\*\**p*<0.005, \*\*\*\**p*<0.001).

419 **Toxicity Assays.** Prior to cardiac perfusion, blood was collected from animal subjects via retro-orbital  
420 bleeding. Blood was immediately mixed with EDTA (10 mM final) then centrifuged at 1000 g for 10 min at  
421 4 °C to allow isolation of plasma. AST assays (Sigma MAK055) and Urea assays (Sigma MAK006) were  
422 performed on plasma per the manufacturer's instructions.

## 423 References

- 424 1 Malumbres, M. & Barbacid, M. Mammalian cyclin-dependent kinases. *Trends Biochem Sci* **30**, 630-641,  
425 doi:10.1016/j.tibs.2005.09.005 (2005).
- 426 2 Vijayaraghavan, S., Moulder, S., Keyomarsi, K. & Layman, R. M. Inhibiting CDK in Cancer Therapy: Current  
427 Evidence and Future Directions. *Target Oncol*, doi:10.1007/s11523-017-0541-2 (2017).
- 428 3 Shapiro, G. I. Cyclin-dependent kinase pathways as targets for cancer treatment. *J Clin Oncol* **24**, 1770-1783,  
429 doi:10.1200/JCO.2005.03.7689 (2006).
- 430 4 Asghar, U., Witkiewicz, A. K., Turner, N. C. & Knudsen, E. S. The history and future of targeting cyclin-  
431 dependent kinases in cancer therapy. *Nat Rev Drug Discov* **14**, 130-146, doi:10.1038/nrd4504 (2015).
- 432 5 Dhavan, R. & Tsai, L. H. A decade of CDK5. *Nat Rev Mol Cell Biol* **2**, 749-759, doi:10.1038/35096019 35096019  
433 [pii] (2001).
- 434 6 Dhariwala, F. A. & Rajadhyaksha, M. S. An unusual member of the Cdk family: Cdk5. *Cell Mol Neurobiol* **28**,  
435 351-369, doi:10.1007/s10571-007-9242-1 (2008).
- 436 7 Tsai, L. H., Delalle, I., Caviness, V. S., Jr., Chae, T. & Harlow, E. p35 is a neural-specific regulatory subunit of  
437 cyclin-dependent kinase 5. *Nature* **371**, 419-423, doi:10.1038/371419a0 (1994).
- 438 8 Angelo, M., Plattner, F. & Giese, K. P. Cyclin-dependent kinase 5 in synaptic plasticity, learning and memory. *J*  
439 *Neurochem* **99**, 353-370, doi:JNC4040 [pii] 10.1111/j.1471-4159.2006.04040.x (2006).
- 440 9 Lee, M. S. *et al.* Neurotoxicity induces cleavage of p35 to p25 by calpain. *Nature* **405**, 360-364,  
441 doi:10.1038/35012636 (2000).
- 442 10 Patrick, G. N. *et al.* Conversion of p35 to p25 deregulates Cdk5 activity and promotes neurodegeneration.  
443 *Nature* **402**, 615-622, doi:10.1038/45159 (1999).

- 444 11 Pozo, K. & Bibb, J. A. The Emerging Role of Cdk5 in Cancer. *Trends Cancer* **2**, 606-618,  
445 doi:10.1016/j.trecan.2016.09.001 (2016).
- 446 12 Pozo, K. *et al.* The role of Cdk5 in neuroendocrine thyroid cancer. *Cancer cell* **24**, 499-511,  
447 doi:10.1016/j.ccr.2013.08.027 (2013).
- 448 13 Wei, K. *et al.* An immunohistochemical study of cyclin-dependent kinase 5 (CDK5) expression in non-small cell  
449 lung cancer (NSCLC) and small cell lung cancer (SCLC): a possible prognostic biomarker. *World J Surg Oncol*  
450 **14**, 34, doi:10.1186/s12957-016-0787-7 (2016).
- 451 14 Xie, W. *et al.* CDK5 and its activator P35 in normal pituitary and in pituitary adenomas: relationship to VEGF  
452 expression. *Int J Biol Sci* **10**, 192-199, doi:10.7150/ijbs.7770 (2014).
- 453 15 Lin, H., Chen, M. C., Chiu, C. Y., Song, Y. M. & Lin, S. Y. Cdk5 regulates STAT3 activation and cell proliferation  
454 in medullary thyroid carcinoma cells. *J Biol Chem* **282**, 2776-2784, doi:M607234200 [pii]  
455 10.1074/jbc.M607234200 (2007).
- 456 16 Demelash, A. *et al.* Achaete-scute homologue-1 (ASH1) stimulates migration of lung cancer cells through  
457 Cdk5/p35 pathway. *Mol Biol Cell* **23**, 2856-2866, doi:10.1091/mbc.E10-12-1010 mbc.E10-12-1010 [pii] (2012).
- 458 17 Xie, W. *et al.* Phosphorylation of kinase insert domain receptor by cyclin-dependent kinase 5 at serine 229 is  
459 associated with invasive behavior and poor prognosis in prolactin pituitary adenomas. *Oncotarget* **7**, 50883-  
460 50894, doi:10.18632/oncotarget.10550 (2016).
- 461 18 Pozo, K. *et al.* Differential expression of cell cycle regulators in CDK5-dependent medullary thyroid carcinoma  
462 tumorigenesis. *Oncotarget* **6**, 12080-12093, doi:10.18632/oncotarget.3813 (2015).
- 463 19 Ghayee, H. K. *et al.* Progenitor cell line (hPheo1) derived from a human pheochromocytoma tumor. *PloS one*  
464 **8**, e65624, doi:10.1371/journal.pone.0065624 (2013).
- 465 20 Asfari, M. *et al.* Establishment of 2-mercaptoethanol-dependent differentiated insulin-secreting cell lines.  
466 *Endocrinology* **130**, 167-178, doi:10.1210/endo.130.1.1370150 (1992).
- 467 21 Weishaupt, J. H. *et al.* Inhibition of CDK5 is protective in necrotic and apoptotic paradigms of neuronal cell  
468 death and prevents mitochondrial dysfunction. *Mol Cell Neurosci* **24**, 489-502, doi:S1044743103002215 [pii]  
469 (2003).
- 470 22 Rikova, K. *et al.* Global survey of phosphotyrosine signaling identifies oncogenic kinases in lung cancer. *Cell*  
471 **131**, 1190-1203, doi:10.1016/j.cell.2007.11.025 (2007).
- 472 23 Sarg, B., Helliger, W., Talasz, H., Forg, B. & Lindner, H. H. Histone H1 phosphorylation occurs site-specifically  
473 during interphase and mitosis: identification of a novel phosphorylation site on histone H1. *J Biol Chem* **281**,  
474 6573-6580, doi:10.1074/jbc.M508957200 (2006).
- 475 24 Talasz, H., Sarg, B. & Lindner, H. H. Site-specifically phosphorylated forms of H1.5 and H1.2 localized at  
476 distinct regions of the nucleus are related to different processes during the cell cycle. *Chromosoma* **118**, 693-  
477 709, doi:10.1007/s00412-009-0228-2 (2009).
- 478 25 Park, S. H., Yu, S. E., Chai, Y. G. & Jang, Y. K. CDK2-dependent phosphorylation of Suv39H1 is involved in  
479 control of heterochromatin replication during cell cycle progression. *Nucleic Acids Res* **42**, 6196-6207,  
480 doi:10.1093/nar/gku263 (2014).
- 481 26 Rubin, S. M. Deciphering the retinoblastoma protein phosphorylation code. *Trends Biochem Sci* **38**, 12-19,  
482 doi:10.1016/j.tibs.2012.10.007 (2013).
- 483 27 Dick, F. A. & Rubin, S. M. Molecular mechanisms underlying RB protein function. *Nat Rev Mol Cell Biol* **14**,  
484 297-306, doi:10.1038/nrm3567 (2013).
- 485 28 Turkdogan, S. *et al.* Carcinoembryonic antigen levels correlated with advanced disease in medullary thyroid  
486 cancer. *J Otolaryngol Head Neck Surg* **47**, 55, doi:10.1186/s40463-018-0303-x (2018).
- 487 29 Nobels, F. R. *et al.* Chromogranin A as serum marker for neuroendocrine neoplasia: comparison with neuron-  
488 specific enolase and the alpha-subunit of glycoprotein hormones. *J Clin Endocrinol Metab* **82**, 2622-2628,  
489 doi:10.1210/jcem.82.8.4145 (1997).
- 490 30 Molinaro, R. *et al.* Biomimetic proteolipid vesicles for targeting inflamed tissues. *Nat Mater* **15**, 1037-1046,  
491 doi:10.1038/nmat4644 (2016).
- 492 31 Molinaro, R. *et al.* Design and Development of Biomimetic Nanovesicles Using a Microfluidic Approach. *Adv*  
493 *Mater* **30**, e1702749, doi:10.1002/adma.201702749 (2018).

- 494 32 Kobayashi, H., Watanabe, R. & Choyke, P. L. Improving conventional enhanced permeability and retention  
495 (EPR) effects; what is the appropriate target? *Theranostics* **4**, 81-89, doi:10.7150/thno.7193 (2013).
- 496 33 Martinez, J. O. *et al.* Biomimetic nanoparticles with enhanced affinity towards activated endothelium as  
497 versatile tools for theranostic drug delivery. *Theranostics* **8**, 1131-1145, doi:10.7150/thno.22078 (2018).
- 498 34 Corbo, C. *et al.* Effects of the protein corona on liposome-liposome and liposome-cell interactions. *Int J*  
499 *Nanomedicine* **11**, 3049-3063, doi:10.2147/IJN.S109059 (2016).
- 500 35 Corbo, C. *et al.* Unveiling the in Vivo Protein Corona of Circulating Leukocyte-like Carriers. *ACS Nano* **11**,  
501 3262-3273, doi:10.1021/acsnano.7b00376 (2017).
- 502 36 Corbo, C. *et al.* The impact of nanoparticle protein corona on cytotoxicity, immunotoxicity and target drug  
503 delivery. *Nanomedicine* **11**, 81-100, doi:10.2217/nnm.15.188 (2016).
- 504 37 Bollag, G. *et al.* Clinical efficacy of a RAF inhibitor needs broad target blockade in BRAF-mutant melanoma.  
505 *Nature* **467**, 596-599, doi:10.1038/nature09454 (2010).
- 506 38 Flaherty, K. T. *et al.* Inhibition of mutated, activated BRAF in metastatic melanoma. *N Engl J Med* **363**, 809-  
507 819, doi:10.1056/NEJMoa1002011 (2010).
- 508 39 Fiskus, W. & Mitsiades, N. B-Raf Inhibition in the Clinic: Present and Future. *Annu Rev Med* **67**, 29-43,  
509 doi:10.1146/annurev-med-090514-030732 (2016).
- 510 40 Chandrasekharappa, S. C. *et al.* Positional cloning of the gene for multiple endocrine neoplasia-type 1.  
511 *Science* **276**, 404-407 (1997).
- 512 41 Lemmens, I. *et al.* Identification of the multiple endocrine neoplasia type 1 (MEN1) gene. The European  
513 Consortium on MEN1. *Hum Mol Genet* **6**, 1177-1183 (1997).
- 514 42 Lemos, M. C. & Thakker, R. V. Multiple endocrine neoplasia type 1 (MEN1): analysis of 1336 mutations  
515 reported in the first decade following identification of the gene. *Hum Mutat* **29**, 22-32,  
516 doi:10.1002/humu.20605 (2008).
- 517 43 Agarwal, S. K. *et al.* Menin molecular interactions: insights into normal functions and tumorigenesis. *Horm*  
518 *Metab Res* **37**, 369-374, doi:10.1055/s-2005-870139 (2005).
- 519 44 Mulligan, L. M. *et al.* Germ-line mutations of the RET proto-oncogene in multiple endocrine neoplasia type  
520 2A. *Nature* **363**, 458-460, doi:10.1038/363458a0 (1993).
- 521 45 Donis-Keller, H. *et al.* Mutations in the RET proto-oncogene are associated with MEN 2A and FMTC. *Hum Mol*  
522 *Genet* **2**, 851-856 (1993).
- 523 46 Hofstra, R. M. *et al.* A mutation in the RET proto-oncogene associated with multiple endocrine neoplasia type  
524 2B and sporadic medullary thyroid carcinoma. *Nature* **367**, 375-376, doi:10.1038/367375a0 (1994).
- 525 47 Wells, S. A., Jr. *et al.* Vandetanib in patients with locally advanced or metastatic medullary thyroid cancer: a  
526 randomized, double-blind phase III trial. *J Clin Oncol* **30**, 134-141, doi:10.1200/JCO.2011.35.5040 (2012).
- 527 48 Kurzrock, R. *et al.* Activity of XL184 (Cabozantinib), an oral tyrosine kinase inhibitor, in patients with  
528 medullary thyroid cancer. *J Clin Oncol* **29**, 2660-2666, doi:10.1200/JCO.2010.32.4145 (2011).
- 529 49 Sherman, S. I. Lessons learned and questions unanswered from use of multitargeted kinase inhibitors in  
530 medullary thyroid cancer. *Oral Oncol* **49**, 707-710, doi:10.1016/j.oraloncology.2013.03.442 (2013).
- 531 50 Beijersbergen, R. L. *et al.* E2F-4, a new member of the E2F gene family, has oncogenic activity and associates  
532 with p107 in vivo. *Genes Dev* **8**, 2680-2690 (1994).
- 533 51 Hijmans, E. M., Voorhoeve, P. M., Beijersbergen, R. L., van 't Veer, L. J. & Bernards, R. E2F-5, a new E2F family  
534 member that interacts with p130 in vivo. *Molecular and cellular biology* **15**, 3082-3089 (1995).
- 535 52 Trimarchi, J. M. & Lees, J. A. Sibling rivalry in the E2F family. *Nat Rev Mol Cell Biol* **3**, 11-20,  
536 doi:10.1038/nrm714 (2002).
- 537 53 Litovchick, L. *et al.* Evolutionarily conserved multisubunit RBL2/p130 and E2F4 protein complex represses  
538 human cell cycle-dependent genes in quiescence. *Mol Cell* **26**, 539-551, doi:10.1016/j.molcel.2007.04.015  
539 (2007).
- 540 54 Sadasivam, S. & DeCaprio, J. A. The DREAM complex: master coordinator of cell cycle-dependent gene  
541 expression. *Nature reviews. Cancer* **13**, 585-595, doi:10.1038/nrc3556 (2013).

542

543 We thank Melanie Cobb, Joseph Goldstein, John Minna, Roswitha Pfragner, and Courtney Townsend for  
544 cell lines and Eric Knudsen for primary fibroblast cultures. We thank Haydn Ball and the UTSW Protein  
545 Technology Core for peptide synthesis, the UTSW Animal Resource Center for antigen injection and blood  
546 collection, Robyn Leidel and Kate Luby-Phelps for help with SEM, Kelly Hartman for assistance with  
547 leukosome preparation, John Totenhagen and Samuria Thomas and the UAB Small Animal Imaging Facility  
548 for additional MRI, and HMRI Intravital Microscopy Core for IVM. We thank Champions Oncology for  
549 PDX tissue and preclinical testing in PDX models, and Pfizer for CP681301.

550

551 This work was supported by an American Cancer Society Postdoctoral Fellowship (A.M.C) and the Sackler  
552 Foundation (A.M.C. and J.A.B.); NIH award S10OD023552-01 (M.T.); an American Thyroid Association  
553 Research Grant and the Dedman Family Scholar in Clinical Care Award (S.C.O.); an American Cancer  
554 Society Institutional Research Grant Junior Faculty Development Award (S.R.) and the SDHB PHEO/Para  
555 Coalition (S.R. and J.A.B.); the William Randolph Heart Foundation, the Robert J. Kleberg, Jr. and Helen C.  
556 Kleberg Foundation, Cancer Prevention & Research Institute of Texas Award ID RP170466, and NCI and  
557 the Office of Research on Women's Health Grant # 1R56CA213859 (E.T.); an American Cancer Society  
558 Research Scholars Award, and NIH awards DA033485-01, MH083711-01, NS073855-01, and  
559 R56MH116896 (J.A.B); and NCI awards 5P30CA142543 (UTSW Simmons Comprehensive Cancer Center)  
560 and P30CA013148 (UAB O'Neal Comprehensive Cancer Center).

561

562 A.M.C. and J.A.B. conceptualized the study. A.M.C. performed cell culture assays, analysis of  
563 phosphoproteomic data, production of phosphorylation state-specific antibodies, immunoblotting, enzyme  
564 and urea assays, quantitation of MRI, IVIS imaging, and contributed to generation of mouse xenograft  
565 models, drug treatments in mouse models, Indo A biodistribution analysis, and performed data analysis. C.T.  
566 performed IHC. K. Pozo contributed to phosphoproteomics and SEM. R.T. contributed to work in mouse  
567 models. R.M. designed, synthesized, and characterized leukosomes. A.G. and T.W. performed

568 phosphoproteomics. E.D.R. and J.O.M. performed IVM. S.Z. and M.T. performed small animal MRI. F.G.  
569 and Boehringer Ingelheim provided Indo A and Indo B. R.J. contributed to generation of xenograft mouse  
570 models. J.A.M. performed LC-MS for Indo A biodistribution analysis. N.K. and M.S.M. performed IPA  
571 analysis. H.K.G. provided the hPheo1 cell line. S.C.O., F.E.N., and S.R. contributed financially. H.C.,  
572 E.G.G., K.J.H., K. Pacak, A.J.G., B.R., and E.A.W. provided human biospecimens. J.A.B., E.T., and H.C.  
573 supervised the study and data interpretation. A.M.C. and J.A.B. wrote the manuscript. All authors reviewed  
574 and edited the manuscript.

575

576 Phosphoproteomic data are deposited in PhosphoSitePlus ([www.phosphositeplus.org](http://www.phosphositeplus.org)). Reprints and  
577 permissions information is available at [www.nature.com/reprints](http://www.nature.com/reprints). The authors declare no competing  
578 financial interests. Readers are welcome to comment on the online version of the paper. Correspondence and  
579 requests for materials should be addressed to J.A.B. ([jbibb@uab.edu](mailto:jbibb@uab.edu))

580 **Figures**

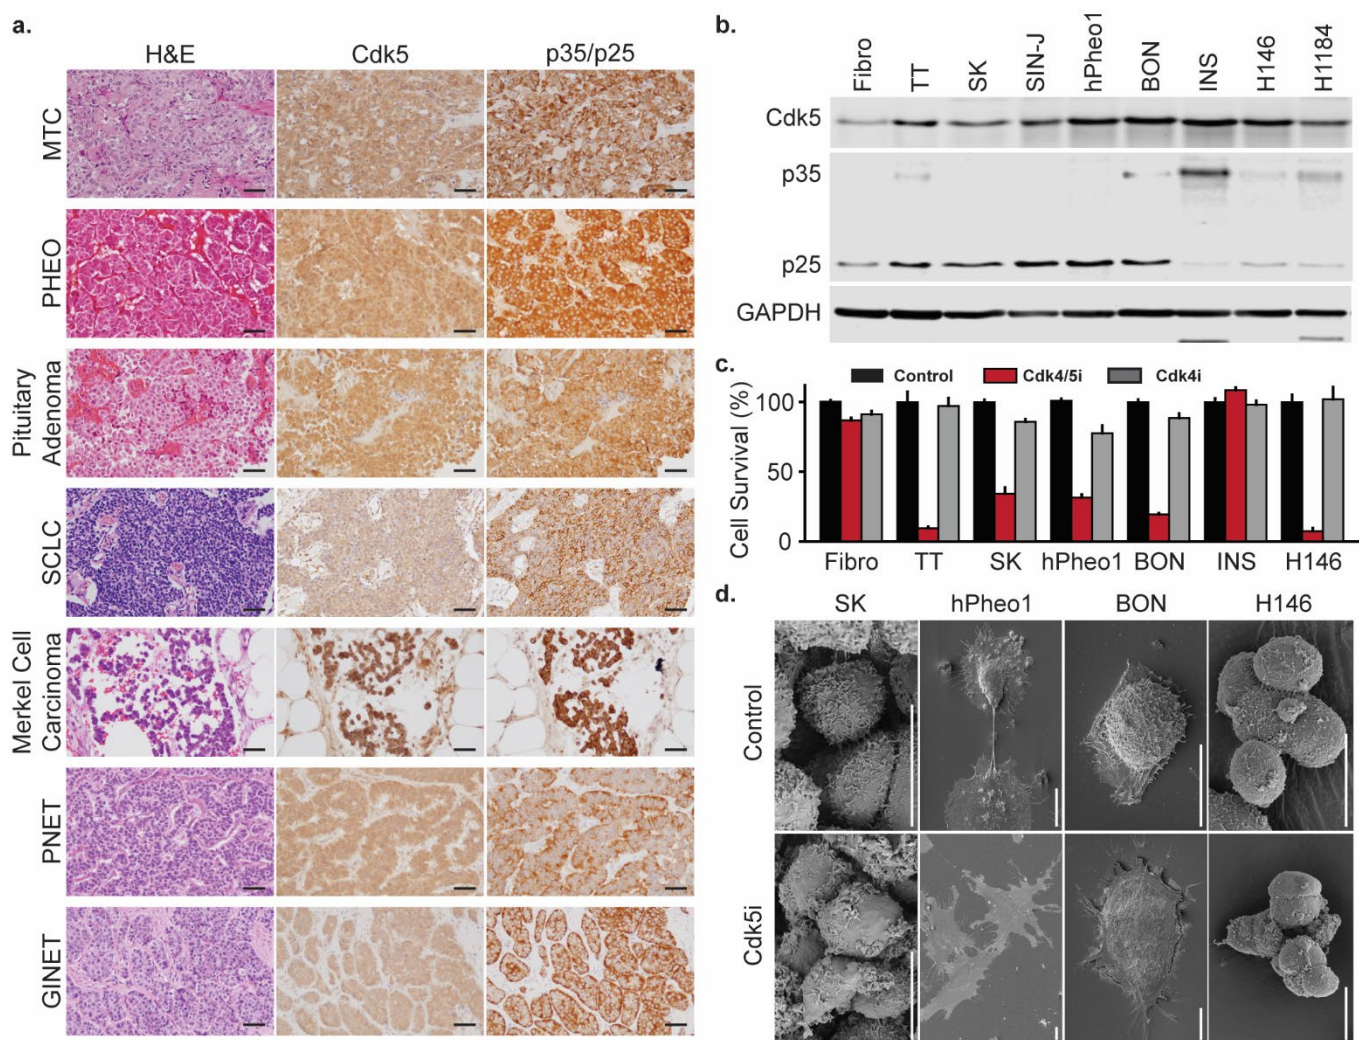

581

582 **Fig. 1: Cdk5 promotes growth in human NE tumors.** **a**, H&E stain, IHC for Cdk5, and IHC p35/p25 in  
 583 human NE tumors. Scale bars = 50  $\mu$ m. **b**, Immunoblot of Cdk5 pathway components in fibroblasts and NE  
 584 cells. **c**, Fibroblasts and NE cell lines were treated with 0.02 % DMSO (Control), 0.3  $\mu$ M Indo A (Cdk4/5i),  
 585 or 0.3  $\mu$ M Indo B (Cdk4i) and monitored for effects on cell growth. Error bars represent SEM. (Full curves  
 586 and IC<sub>50</sub> values are reported in Ext. Data Fig. 1). **d**, Scanning electron microscopy of NE cells treated with  
 587 Control (0.02% DMSO) or Cdk5i (hPheo1 and BON - 2  $\mu$ M Indo A; MTC-SK and H146 - 5  $\mu$ M  
 588 CP6813101) for 4 h. Scale bars = 10  $\mu$ m.

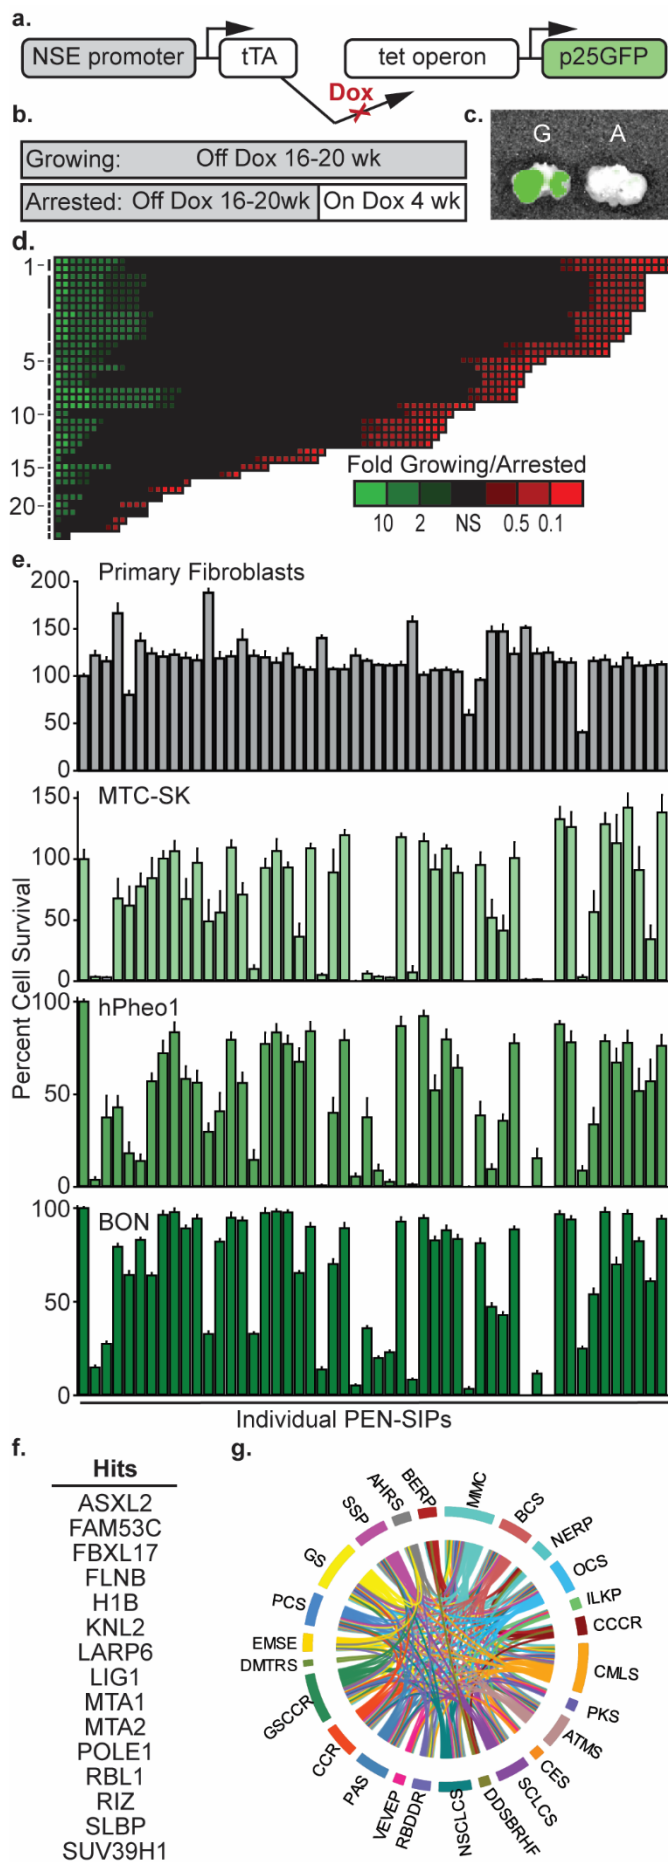

590 **Fig. 2: Identification of potential tumorigenic phosphoprotein signaling pathways. a**, Schematic of bi-  
591 transgenic system for regulated tissue specific expression of p25GFP. **b**, Diagram of induction paradigm for  
592 generation of growing and arrested tumor tissue. **c**, Overlay of photograph and GFP fluorescence from IVIS  
593 analysis of resected trachea/esophagus with bilateral growing (G) and arrested (A) tumor tissue. **d**,  
594 Phosphoproteome of mouse MTC tumors represented as a heat map of phosphopeptide levels in growing  
595 versus arrested tumors sorted by protein group as indicated in Ext. Data Table 1 (y – axis) and fold change  
596 intensity (x – axis). **e**, Growth/survival assay of NE cell lines treated with control (0.3 % DMSO) or the  
597 PEN-SIPs (30  $\mu$ M) indicated in Ext. Data Table 2. Error bars represent SEM. (n=7-8). **f**, Hits selected from  
598 **(e)**. **g**, Ingenuity Pathway Analysis of hits from **e**.



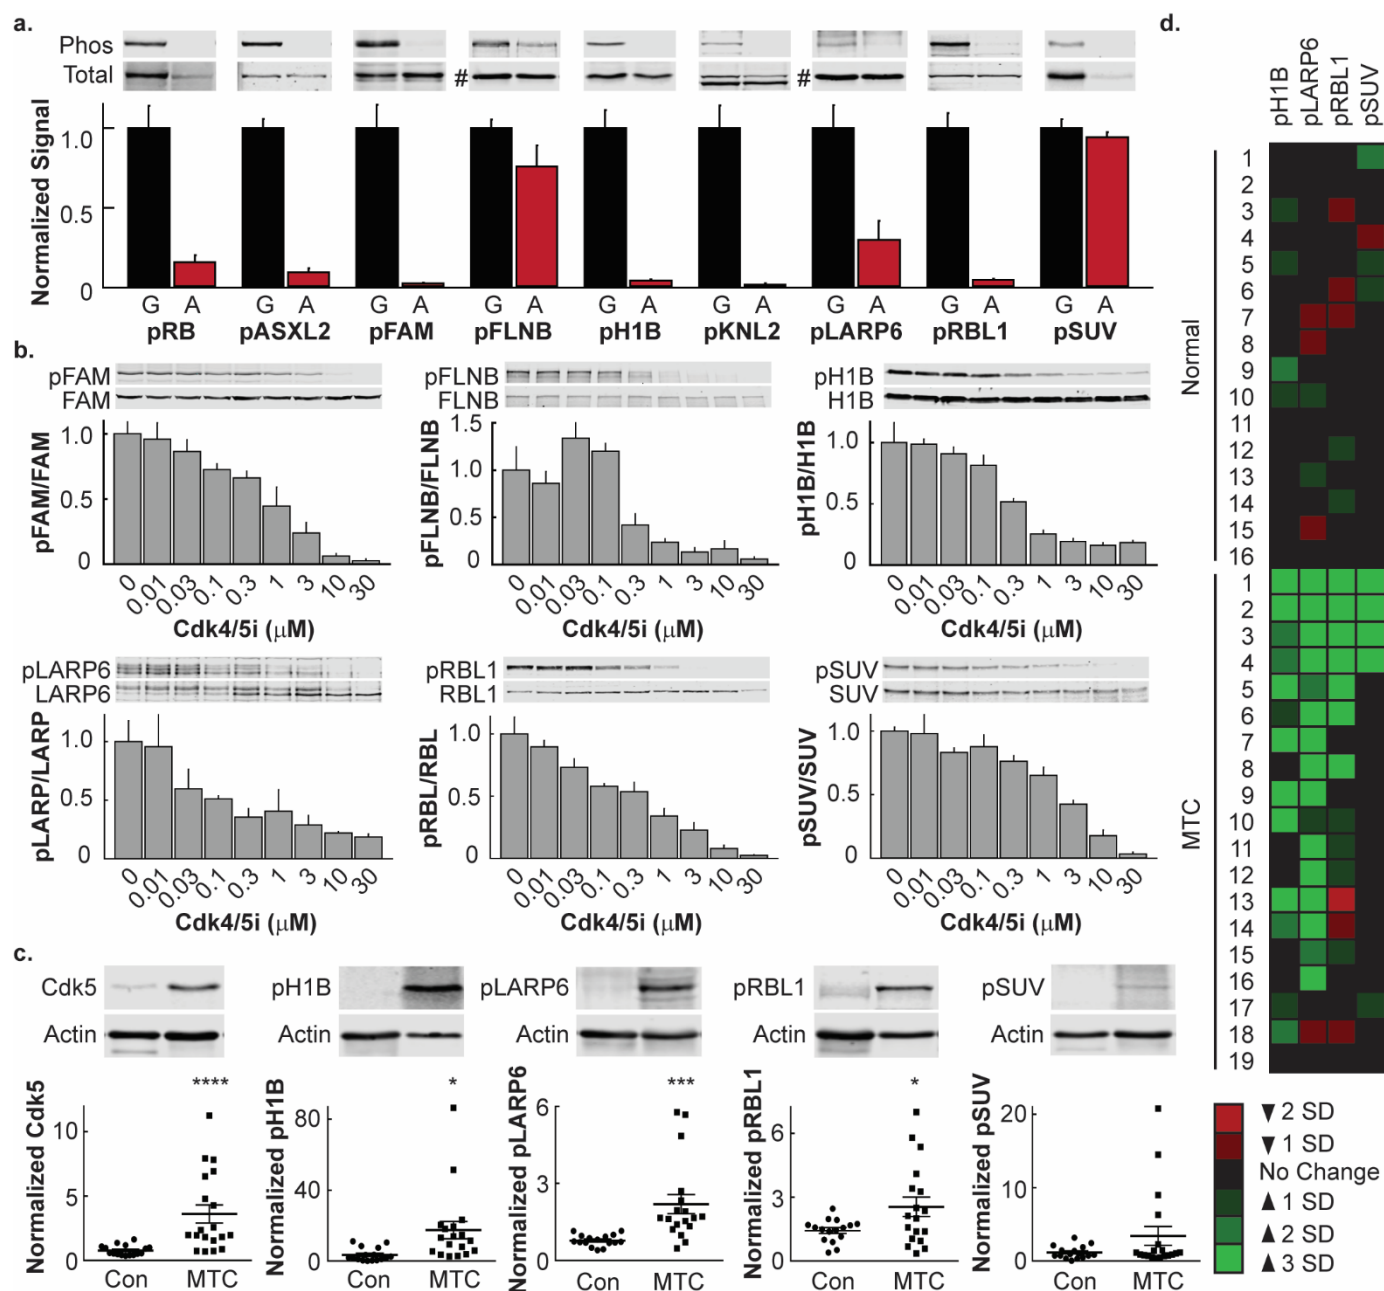

599  
600 **Fig. 3: Phosphoproteins are biomarkers of Cdk5 dependent NE tumors.** **a,** Immunoblot analysis of  
601 phosphoproteins in growing (G) and arrested (A) mouse MTC tumors. For pFLNB and pLARP6, total blot is  
602 actin (#); all others are normalized to each specific protein. (n=3-4). **b,** Immunoblot analysis of  
603 phosphoproteins in human hPheo1 cells treated with increasing concentrations of Indo A (Cdk4/5i) for 4  
604 hours. (n=3-4 for all except 0.01, 1, and 30  $\mu$ M points of pLARP6 where n=2) **c,** Immunoblot analysis of  
605 Cdk5 and phosphoproteins in normal human thyroid tissue and human MTC tumors. Due to sample size,  
606 samples were processed on three gels, each containing a reference for normalization. **d,** Heat map

607 representation of immunoblot analysis of phosphoproteins from **c**, relative to the average and standard  
608 deviation (SD) of the total normal thyroid population, grouped by individual patient sample. All error bars  
609 represent SEM.

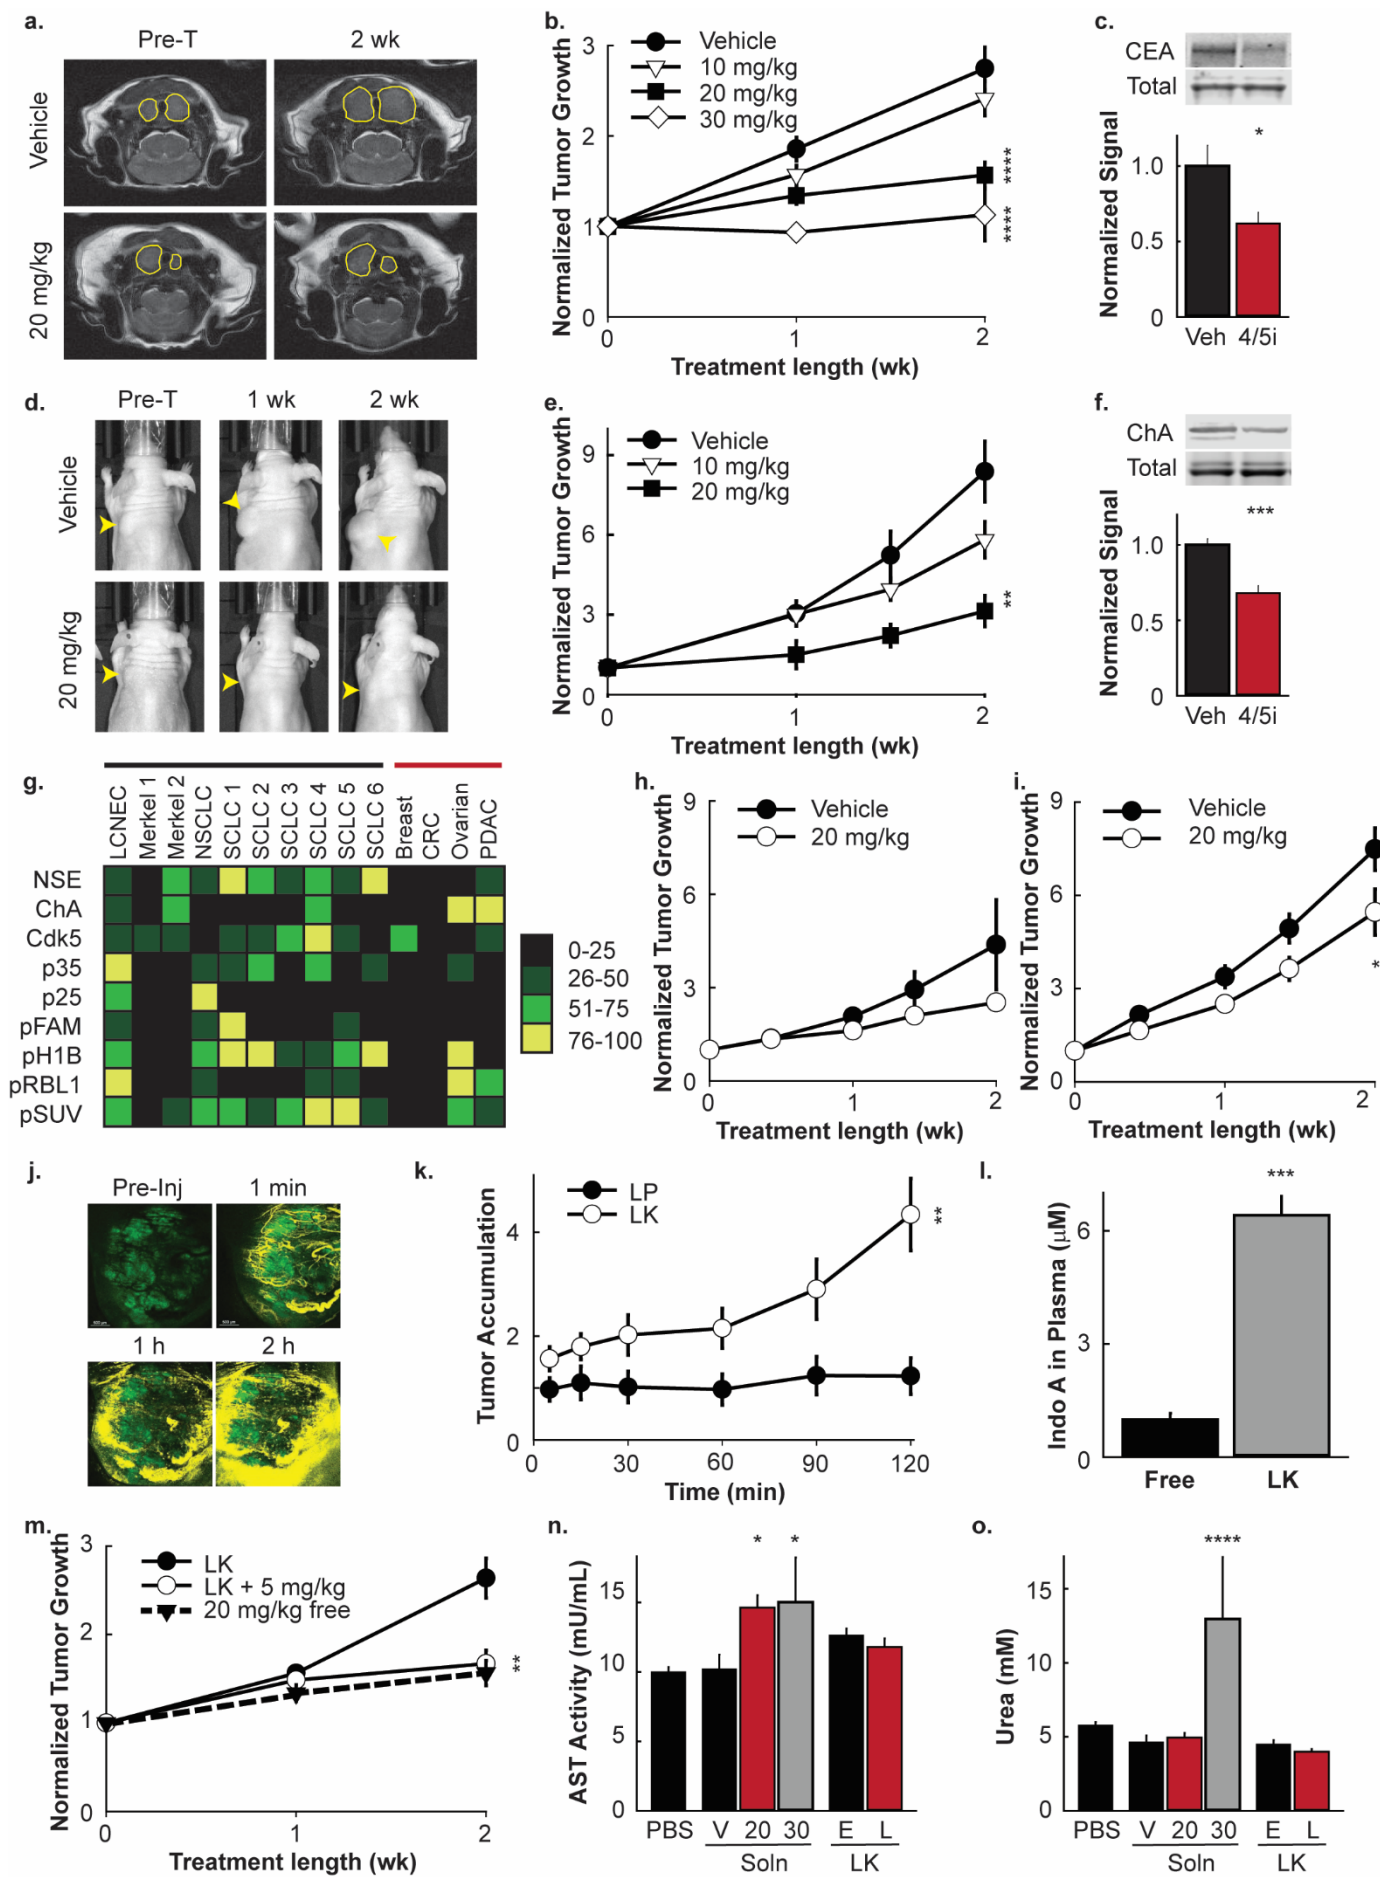

611 **Fig. 4: Targeted Therapy. a**, Representative MRIs of NSE-p25 MTC model mice prior to treatment (Pre-  
612 T) or treated for 2 wk with vehicle or 20 mg/kg BW Indo A. Tumors outlined in yellow. **b**, Quantitation of  
613 tumor growth over time from MRI of NSE-p25 MTC mice treated with vehicle (n=6) or 10 mg/kg (n=4), 20  
614 mg/kg (n=6), or 30 mg/kg (n=3-4) BW Indo A. **c**, Immunoblot analysis of blood plasma in vehicle and 20-30  
615 mg/kg BW Indo A animals from **b**. **d**, Representative images of TT cell xenograft MTC model mice treated  
616 for 2 wk with vehicle or 20 mg/kg BW Indo A. Tumors marked by yellow arrowheads. **e**, Quantitation of  
617 tumor growth over time from caliper measurements of TT cell xenograft MTC model mice treated with  
618 vehicle or 10 mg/kg or 20 mg/kg BW Indo A (n=5-7). **f**, Immunoblot analysis of blood plasma in vehicle and  
619 20 mg/kg BW Indo A animals from **e**. **g**, Heat map of phosphoprotein population percentile ranking from  
620 immunoblot analysis of NE tumors (black bar) and non-NE tumors (red bar) from PDX model mice. **h-i**,  
621 Quantitation of tumor growth over time from biomarker negative (**h**; n=5-6) and biomarker positive (**i**; n=8)  
622 PDX model mice treated with vehicle or 20 mg/kg BW Indo A (20 mg/kg). **j**, Representative images of MTC  
623 tumors from NSE-p25 mice injected with Cy5.5 labeled LKs and imaged *in vivo* over 2 h using IVM; green  
624 – tumor cells, yellow – LKs. **k**, Quantitation of accumulation of Cy5.5 labeled LPs and LKs in MTC tumors  
625 of NSE-p25 mice over time normalized by total tumor size (n=7-8). **l**, HPLC-MS analysis of Indo A in blood  
626 plasma from NSE-p25 MTC mice treated with 5 mg/kg BW Indo A (Free) or 5 mg/kg BW Indo A  
627 encapsulated in LKs (LK) (n=3) **m**, Quantitation of tumor growth over time from MRI of NSE-p25 MTC  
628 mice treated with empty LKs or 5 mg/kg BW Indo A encapsulated in LKs (LK + 5 mg/kg) compared to 20  
629 mg/kg BW free Indo A from **b** (n=5-6). **n-o**, Analysis of blood plasma for AST activity (**m**) and urea level  
630 (**n**) in animals treated with PBS, Indo A in solution (V-vehicle alone, 20 mg/kg BW, or 30 mg/kg BW), or  
631 Indo A encapsulated in LKs (E-empty LK, L-drug loaded LK). All error bars represent SEM.

632 **Extended Data**

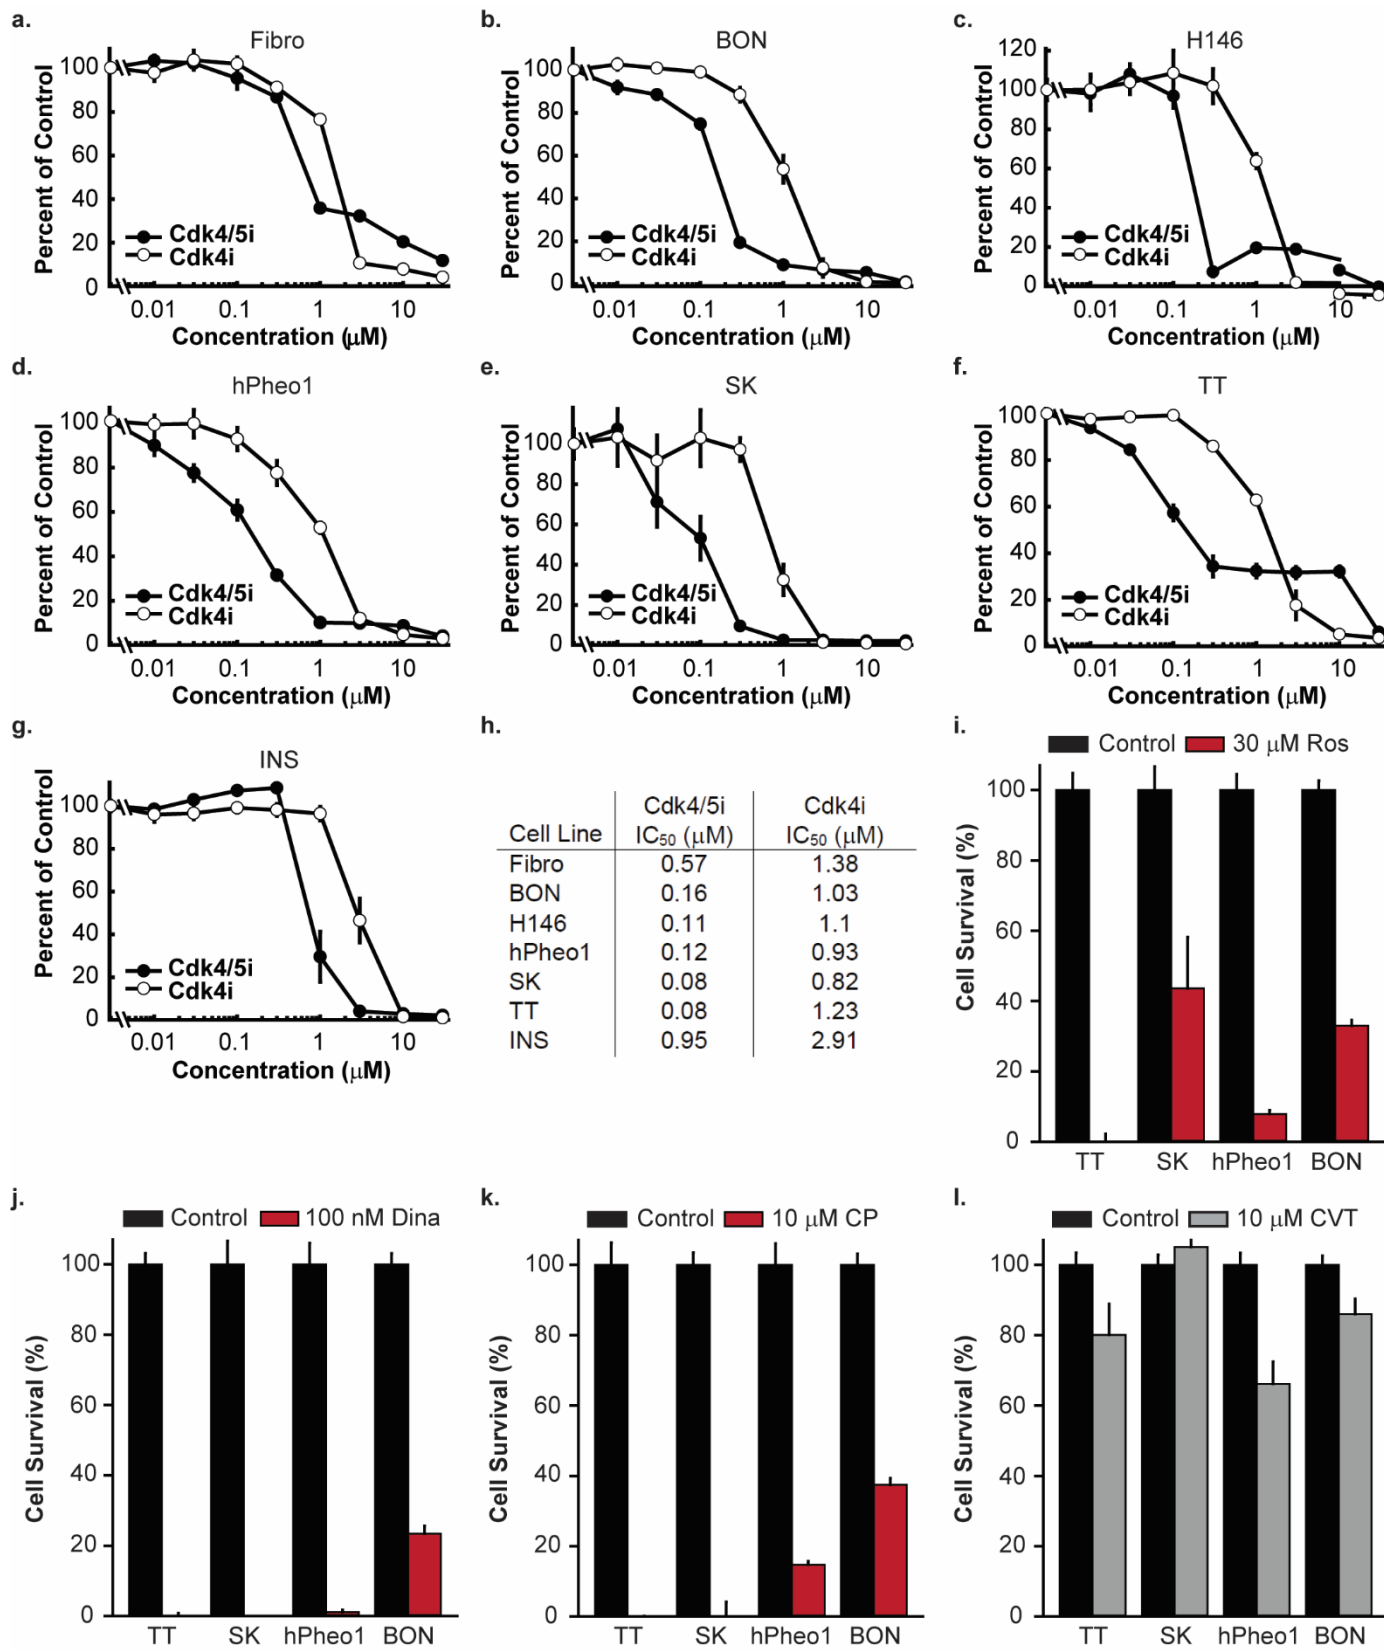

633

634 **Extended Data Fig. 1: Cdk5 inhibition blocks growth of NE cancer cells. a-g**, Cells were treated with  
635 increasing concentrations of Indo A (Cdk4/5i; n=6-9) and Indo B (Cdk4i; n=6-9) and monitored for effects  
636 on cell growth. **h**, IC<sub>50</sub> values for each cell line and inhibitor were calculated by 4-parameter logistic  
637 regression. **i-l**, NE cell lines were treated with control or the Cdk inhibitor indicated; Roscovitine (Ros; n=4-  
638 8), Dinaclylib (Dina; n=6-8), CP681301 (CP; n=4-8), or CVT313 (CVT; n=8-12).

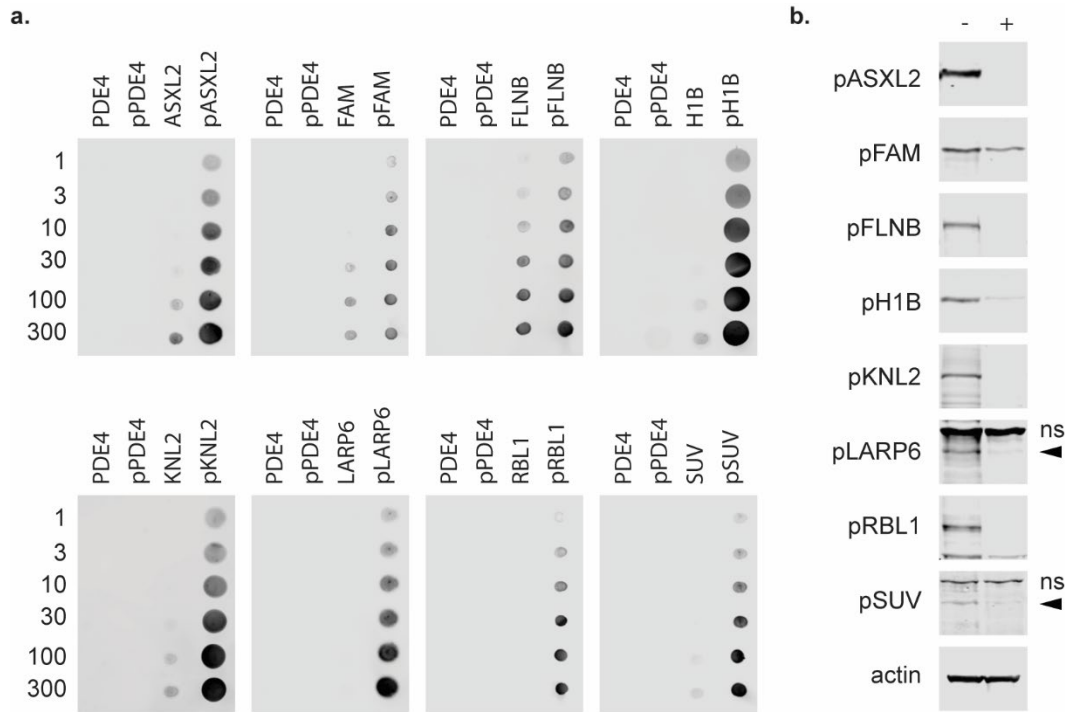

639

640 **Extended Data Fig. 2: Phosphorylation state-specific antibody validation. a,** Dot blots of nitrocellulose  
 641 spotted with increasing pmol of PDE4 peptide, phospho-PDE4 (pPDE4) peptide, peptide of interest, or  
 642 phospho-peptide of interest and probed with affinity purified anti-sera. **b,** Immunoblot analysis of NSE-  
 643 p25OE tumor lysate, treated with (+) and without (-) lambda protein phosphatase, probed with affinity  
 644 purified anti-sera. Non-specific bands (ns), specific bands denoted by arrowheads where applicable.

a. BON cells

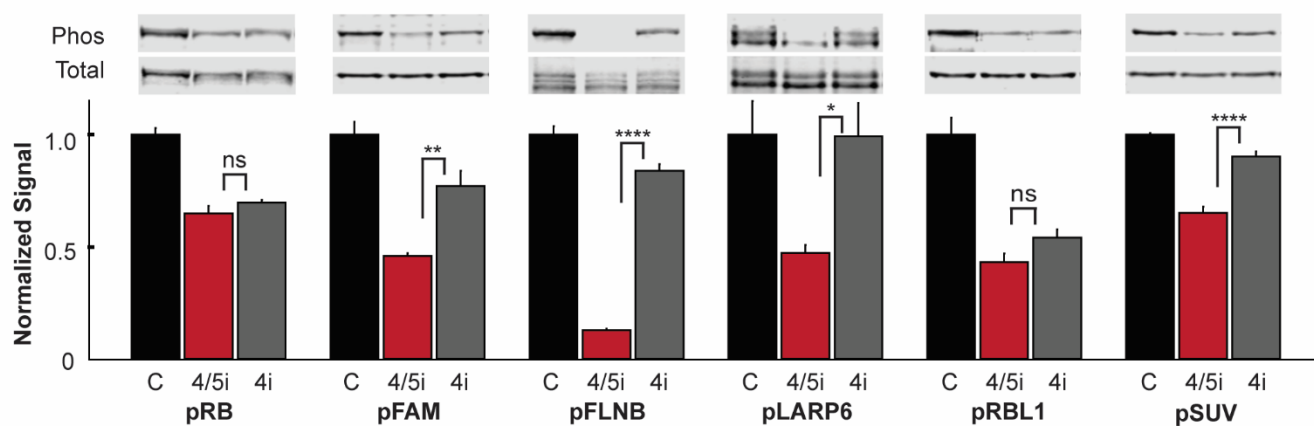

b. TT cells

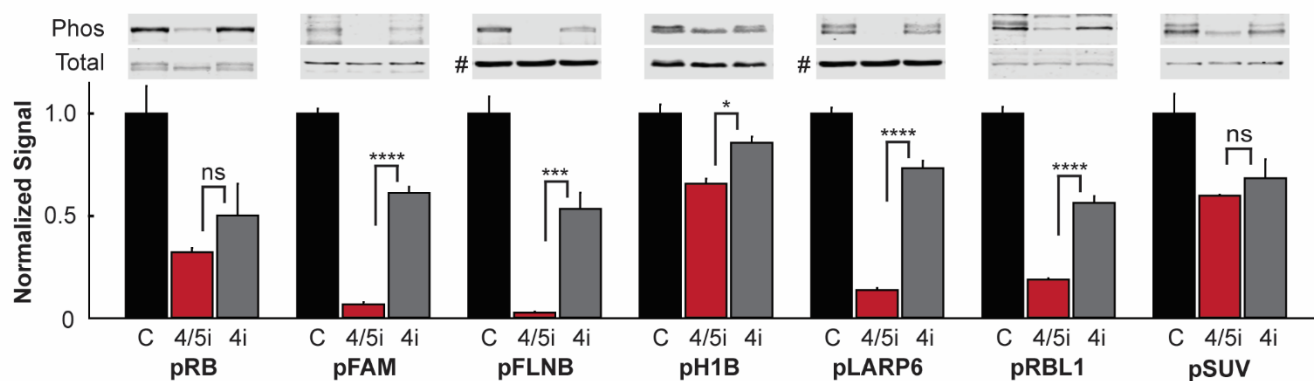

c. SK cells

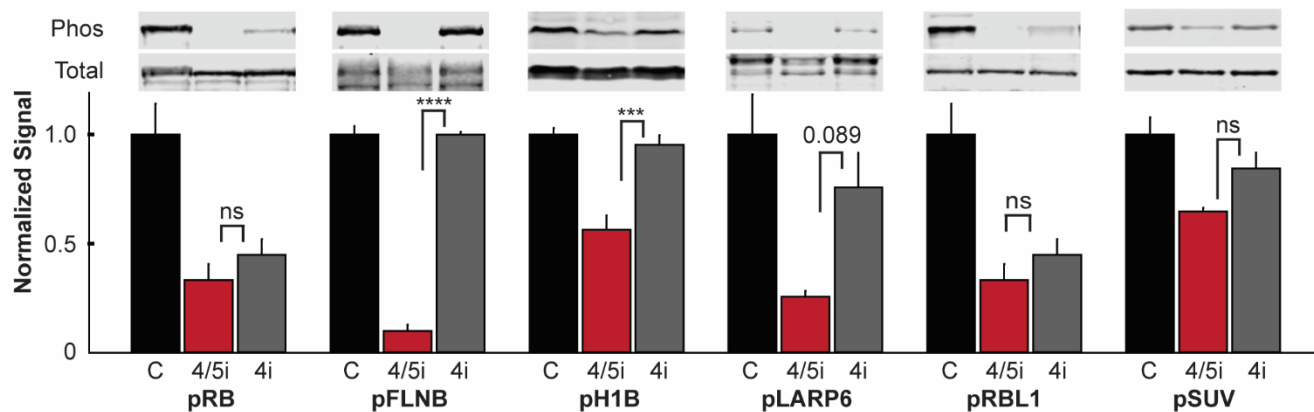

645

646

647

648

649

**Extended Data Fig. 3: Phosphoproteins are dependent on Cdk5 activity.** a-c, Immunoblot analysis of phosphoproteins in BON cells (a), TT cells (b), and MTC-SK cells (c) treated with 0.3% DMSO (Control), 2  $\mu$ M Indo A (Cdk4/5i), or 2  $\mu$ M Indo B (Cdk4i) for 4 h. For b, pFLNB and pLARP are normalized to actin (#); all others are normalized to each specific protein. Statistics by One-way ANOVA, n=3.



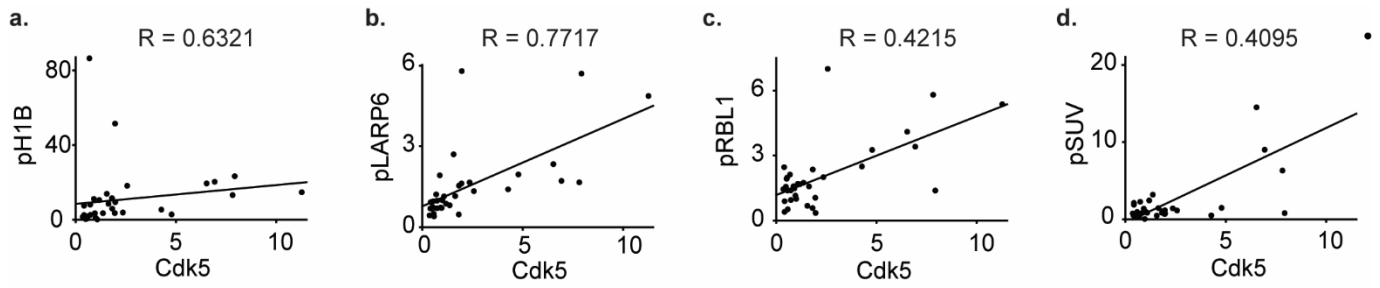

650

651

652

653

**Extended Data Fig. 4: Phosphoprotein levels correlate with Cdk5 expression.** Phosphoprotein level versus Cdk5 expression in samples represented in Fig. 3c-d analyzed by Spearman rank-order analysis; rho (R).

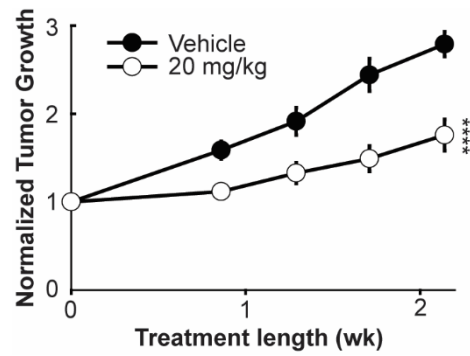

654

655 **Extended Data Fig. 5: Inhibition of Cdk5 activity suppresses growth of pancreatic NE tumors.**

656 Quantitation of tumor growth over time from caliper measurements of BON xenograft pancreatic NE tumor

657 model mice treated with vehicle or 20 mg/kg BW Indo A. (n=8-9).

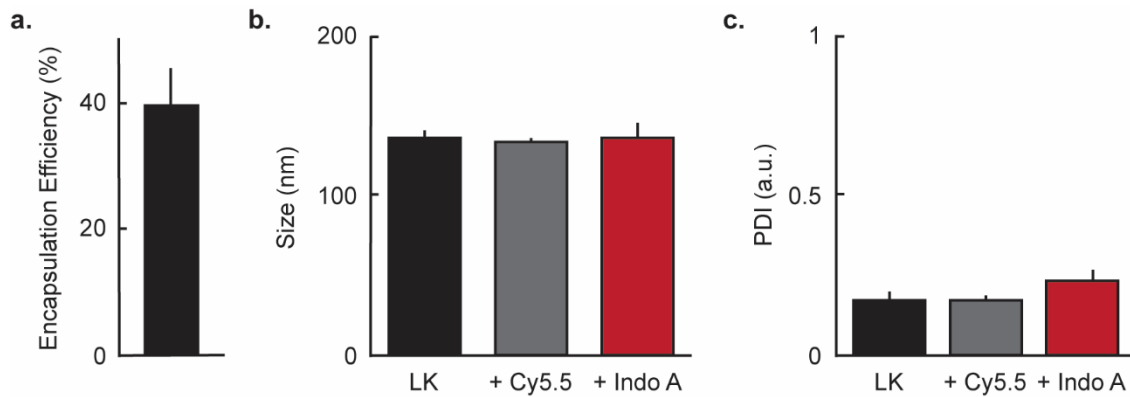

658

659

**Extended Data Fig. 6: Encapsulation of Indo A does not affect biophysical properties of LKs. a,**

660

Entrapment efficiency of Indo A into LKs as determined by intrinsic Indo A fluorescence. **b-c,** Dynamic

661

light scattering analysis of LKs, Cy5.5 labeled LKs, and Indo A loaded LKs to determine size (**b**) and

662

polydispersity (**c**).

663

**Extended Data Table 1: Protein groups of peptides identified in LC-MS/MS of MTC mouse tumors.**

| <b># in Fig. 2A</b> | <b>Group</b>                     | <b>Percent of Total</b> | <b>Percent of Upregulated</b> |
|---------------------|----------------------------------|-------------------------|-------------------------------|
| 1                   | Autophagy                        | 8.6                     | 6.9                           |
| 2                   | Development and differentiation  | 20.5                    | 21.5                          |
| 3                   | Kinase (non-protein)             | 15.9                    | 18.3                          |
| 4                   | Other                            | 7.7                     | 5.9                           |
| 5                   | Tumor Suppressor                 | 3.4                     | 2.4                           |
| 6                   | Translation                      | 3.3                     | 3.5                           |
| 7                   | Lipid binding                    | 6.5                     | 3.8                           |
| *8                  | Apoptosis                        | 6.5                     | 12.1                          |
| *9                  | Protease                         | 2.9                     | 5.9                           |
| 10                  | Ub conjugation                   | 2.8                     | 0.7                           |
| 11                  | Phosphatase                      | 5.4                     | 4.5                           |
| 12                  | Intracellular structures         | 5.3                     | 3.1                           |
| 13                  | Protein Kinase signaling         | 1.9                     | 1.0                           |
| 14                  | Receptor/channel/surface protein | 1.8                     | 0.3                           |
| *15                 | Adhesion/ECM                     | 1.5                     | 2.8                           |
| 16                  | Cell Cycle regulator             | 1.3                     | 1.7                           |
| *17                 | DNA binding                      | 0.9                     | 1.7                           |
| 18                  | Adaptor Scaffold                 | 0.9                     | 0.0                           |
| *19                 | Miscellaneous Enzyme             | 0.7                     | 1.4                           |
| 20                  | G-protein or regulator           | 0.6                     | 0.7                           |
| *21                 | RNA processing                   | 0.6                     | 1.0                           |
| 22                  | Transcriptional regulator        | 0.5                     | 0.3                           |
| 23                  | Unknown                          | 0.4                     | 0.0                           |
| *24                 | Cytoskeletal                     | 0.1                     | 0.3                           |

\* - enriched in upregulated (levels in growing/arrested tumors  $\geq 2$ ) vs. total population of peptides.

664

665 **Extended Data Table 2: Growth inhibition by individual SIPs represented in Fig. 2b.**

| #   | SIP Target       | Percent Growth $\pm$ SEM |                |               |               |
|-----|------------------|--------------------------|----------------|---------------|---------------|
|     |                  | Fibro                    | SK             | PHEO          | BON           |
| 1   | Control 1 (HBSS) | 100 $\pm$ 2.4            | 100 $\pm$ 2.7  | 100 $\pm$ 1.2 | 100 $\pm$ 0.7 |
| *2  | LIG1             | 122 $\pm$ 5.0            | 4 $\pm$ 0.6    | 4 $\pm$ 1.5   | 15 $\pm$ 1.2  |
| *3  | POLE             | 116 $\pm$ 4.7            | 3 $\pm$ 0.4    | 38 $\pm$ 11.8 | 28 $\pm$ 1.3  |
| 4   | LIN9a            | 166 $\pm$ 10.5           | 68 $\pm$ 16.2  | 43 $\pm$ 6.2  | 79 $\pm$ 1.7  |
| 5   | POLA1            | 80 $\pm$ 4.5             | 62 $\pm$ 15.6  | 18 $\pm$ 6.0  | 64 $\pm$ 2.2  |
| *6  | RBL1             | 137 $\pm$ 7.9            | 78 $\pm$ 10.6  | 14 $\pm$ 3.6  | 83 $\pm$ 1.2  |
| 7   | INADL            | 124 $\pm$ 5.5            | 84 $\pm$ 16.5  | 57 $\pm$ 4.3  | 64 $\pm$ 1.3  |
| 8   | NCL              | 121 $\pm$ 5.4            | 100 $\pm$ 6.2  | 72 $\pm$ 6.7  | 96 $\pm$ 2.1  |
| 9   | STMN1            | 123 $\pm$ 5.1            | 106 $\pm$ 8.4  | 84 $\pm$ 5.3  | 98 $\pm$ 2.0  |
| 10  | WHSC2            | 119 $\pm$ 5.2            | 67 $\pm$ 16.6  | 58 $\pm$ 6.8  | 89 $\pm$ 1.6  |
| 11  | SCAPER           | 117 $\pm$ 5.7            | 97 $\pm$ 11.8  | 56 $\pm$ 6.4  | 94 $\pm$ 2.1  |
| 12  | SCC112           | 188 $\pm$ 4.4            | 49 $\pm$ 17.6  | 30 $\pm$ 4.7  | 33 $\pm$ 1.4  |
| *13 | H1B              | 119 $\pm$ 6.9            | 56 $\pm$ 17.5  | 41 $\pm$ 9.9  | 82 $\pm$ 1.5  |
| 14  | APRIN            | 121 $\pm$ 5.3            | 109 $\pm$ 6.0  | 79 $\pm$ 4.0  | 95 $\pm$ 2.7  |
| 15  | NUMA1            | 138 $\pm$ 11.0           | 71 $\pm$ 9.6   | 56 $\pm$ 5.7  | 93 $\pm$ 1.7  |
| *16 | LARP6            | 122 $\pm$ 5.6            | 10 $\pm$ 3.2   | 15 $\pm$ 5.4  | 33 $\pm$ 1.0  |
| 17  | MYBBP61A         | 120 $\pm$ 6.5            | 93 $\pm$ 7.7   | 77 $\pm$ 6.2  | 97 $\pm$ 2.6  |
| 18  | WHSC1            | 114 $\pm$ 5.3            | 107 $\pm$ 9.7  | 83 $\pm$ 4.4  | 98 $\pm$ 1.4  |
| 19  | MGC4707          | 124 $\pm$ 5.7            | 93 $\pm$ 4.2   | 77 $\pm$ 4.5  | 98 $\pm$ 1.3  |
| 20  | ALDH2            | 109 $\pm$ 2.7            | 36 $\pm$ 10.6  | 68 $\pm$ 7.3  | 65 $\pm$ 1.1  |
| 21  | LIG1b            | 107 $\pm$ 2.7            | 109 $\pm$ 3.7  | 84 $\pm$ 5.1  | 90 $\pm$ 1.9  |
| *22 | MTA2             | 140 $\pm$ 3.1            | 5 $\pm$ 0.9    | 1 $\pm$ 0.4   | 14 $\pm$ 1.3  |
| 23  | GTF3C1           | 107 $\pm$ 1.4            | 89 $\pm$ 19.0  | 40 $\pm$ 8.2  | 70 $\pm$ 2.7  |
| 24  | SPT5             | 107 $\pm$ 4.9            | 120 $\pm$ 4.3  | 79 $\pm$ 5.5  | 89 $\pm$ 2.9  |
| *25 | FLNB             | 122 $\pm$ 7.0            | 0 $\pm$ 0.2    | 6 $\pm$ 1.8   | 5 $\pm$ 0.7   |
| 26  | IQCE             | 116 $\pm$ 1.8            | 6 $\pm$ 1.9    | 38 $\pm$ 10.3 | 36 $\pm$ 1.2  |
| *27 | ASXL2            | 112 $\pm$ 1.2            | 4 $\pm$ 0.4    | 9 $\pm$ 3.3   | 20 $\pm$ 1.0  |
| *28 | SUV39H1          | 111 $\pm$ 1.5            | 3 $\pm$ 0.3    | 3 $\pm$ 1.1   | 23 $\pm$ 1.1  |
| 29  | SNXL3            | 112 $\pm$ 3.7            | 118 $\pm$ 3.0  | 87 $\pm$ 5.1  | 93 $\pm$ 2.3  |
| *30 | KNL2             | 158 $\pm$ 5.5            | 7 $\pm$ 5.0    | 1 $\pm$ 0.5   | 8 $\pm$ 1.0   |
| 31  | CASZ1            | 101 $\pm$ 2.9            | 114 $\pm$ 6.2  | 92 $\pm$ 3    | 95 $\pm$ 1.6  |
| 32  | SH3BP4           | 106 $\pm$ 2              | 91 $\pm$ 12    | 52 $\pm$ 8    | 83 $\pm$ 2.1  |
| 33  | HPCAL            | 107 $\pm$ 2.5            | 109 $\pm$ 2.8  | 80 $\pm$ 5.5  | 88 $\pm$ 2.5  |
| 34  | ACSL4            | 105 $\pm$ 2.1            | 89 $\pm$ 5.4   | 64 $\pm$ 6.8  | 83 $\pm$ 2.3  |
| 35  | eIF3ep           | 59 $\pm$ 5               | 0 $\pm$ 0.4    | 0 $\pm$ 0.3   | 3 $\pm$ 1     |
| 36  | EPLIN            | 96 $\pm$ 1.9             | 95 $\pm$ 10.5  | 39 $\pm$ 7.4  | 81 $\pm$ 2.6  |
| *37 | MTA1             | 147 $\pm$ 5.5            | 52 $\pm$ 15.1  | 10 $\pm$ 2.7  | 47 $\pm$ 2.1  |
| 38  | Rb1a             | 147 $\pm$ 7.4            | 41 $\pm$ 12.4  | 36 $\pm$ 3.5  | 43 $\pm$ 1.6  |
| 39  | USP24            | 123 $\pm$ 6.3            | 101 $\pm$ 13.4 | 78 $\pm$ 4.9  | 89 $\pm$ 1.7  |
| *40 | FBXL17           | 151 $\pm$ 2.1            | 1 $\pm$ 1      | 0 $\pm$ 0.1   | 0 $\pm$ 0.1   |

667

**Extended Data Table 2 continued: Growth inhibition by individual SIPs represented in Fig. 2b.**

| #   | SIP Target          | Percent Growth $\pm$ SEM |                |              |              |
|-----|---------------------|--------------------------|----------------|--------------|--------------|
|     |                     | Fibro                    | SK             | PHEO         | BON          |
| *41 | SLBP                | 124 $\pm$ 4.8            | 2 $\pm$ 0.2    | 16 $\pm$ 5.1 | 12 $\pm$ 1.4 |
| *42 | RIZ                 | 125 $\pm$ 5.3            | 0 $\pm$ 0.2    | 0 $\pm$ 0.1  | 0 $\pm$ 0.1  |
| 43  | RbBP6               | 115 $\pm$ 3.4            | 133 $\pm$ 10.3 | 88 $\pm$ 1.8 | 97 $\pm$ 1.7 |
| 44  | USP14               | 114 $\pm$ 4.4            | 126 $\pm$ 12.4 | 78 $\pm$ 6   | 94 $\pm$ 1.7 |
| 45  | eIF3eta             | 41 $\pm$ 2               | 3 $\pm$ 1.4    | 9 $\pm$ 2.4  | 25 $\pm$ 1.2 |
| 46  | Rb1b                | 116 $\pm$ 3.7            | 57 $\pm$ 17.3  | 34 $\pm$ 8.9 | 54 $\pm$ 3.3 |
| 47  | GPATCH8             | 117 $\pm$ 4.8            | 129 $\pm$ 9.1  | 79 $\pm$ 3.3 | 98 $\pm$ 2.2 |
| 48  | ELAVL1              | 110 $\pm$ 3.7            | 113 $\pm$ 23.3 | 67 $\pm$ 7.6 | 70 $\pm$ 3.8 |
| 49  | LIN9b               | 119 $\pm$ 5.4            | 142 $\pm$ 11.8 | 78 $\pm$ 6.6 | 97 $\pm$ 1.9 |
| 50  | ABI1                | 111 $\pm$ 3.8            | 91 $\pm$ 19    | 52 $\pm$ 12  | 82 $\pm$ 1.7 |
| *51 | FAM53C              | 112 $\pm$ 4.7            | 34 $\pm$ 11.3  | 57 $\pm$ 12  | 61 $\pm$ 1.5 |
| 52  | Control 2 (PEN tag) | 112 $\pm$ 2.9            | 138 $\pm$ 14.3 | 76 $\pm$ 5.9 | 94 $\pm$ 1.6 |

668

\* selected as a hit

669 **Extended Data Table 3: Pathway Enrichment Analysis on 15 selected hits.**

| Abbreviation | Ingenuity Canonical Pathways                               | $-\log(p\text{-value})$ | Molecules    | Color           |
|--------------|------------------------------------------------------------|-------------------------|--------------|-----------------|
| AHRS         | Aryl Hydrocarbon Receptor Signaling                        | 1.08                    | RBL1         | Gray            |
| ATMS         | ATM Signaling                                              | 1.23                    | SUV39H1      | rosybrown       |
| BCS          | Bladder Cancer Signaling                                   | 1.23                    | SUV39H1      | indianred       |
| BERP         | BER pathway                                                | 4.61                    | POLE,LIG1    | firebrick       |
| CCCR         | Cell Cycle Control of Chromosomal Replication              | 3.3                     | POLE,LIG1    | darkred         |
| CCR          | Cyclins and Cell Cycle Regulation                          | 1.31                    | SUV39H1      | orangered       |
| CES          | Caveolar-mediated Endocytosis Signaling                    | 1.36                    | FLNB         | darkorange      |
| CMLS         | Chronic Myeloid Leukemia Signaling                         | 2.63                    | SUV39H1,RBL1 | orange          |
| DDSBHR       | DNA Double-Strand Break Repair by Homologous Recombination | 2.05                    | LIG1         | olive           |
| DMTRS        | DNA Methylation and Transcriptional Repression Signaling   | 3.68                    | MTA2,MTA1    | olivedrab       |
| EMSE         | Estrogen-mediated S-phase Entry                            | 1.78                    | RBL1         | gold            |
| GS           | Glioma Signaling                                           | 2.56                    | SUV39H1,RBL1 | yellow          |
| GSCCR        | Cell Cycle: G1/S Checkpoint Regulation                     | 3.13                    | SUV39H1,RBL1 | seagreen        |
| ILKP         | ILK Signaling                                              | 0.928                   | FLNB         | springgreen     |
| MMC          | Molecular Mechanisms of Cancer                             | 1.61                    | SUV39H1,RBL1 | turquoise       |
| NERP         | NER Pathway                                                | 2.75                    | POLE,LIG1    | mediumturquoise |
| NSCLCS       | Non-Small Cell Lung Cancer Signaling                       | 1.26                    | SUV39H1      | teal            |
| OCS          | Ovarian Cancer Signaling                                   | 1.03                    | SUV39H1      | deepskyblue     |
| PAS          | Pancreatic Adenocarcinoma Signaling                        | 1.12                    | SUV39H1      | steelblue       |
| PCS          | Prostate Cancer Signaling                                  | 1.18                    | SUV39H1      | dodgerblue      |
| PKS          | Protein Kinase A Signaling                                 | 0.666                   | FLNB         | slateblue       |
| RBDDR        | Role of BRCA1 in DNA Damage Response                       | 1.3                     | RBL1         | mediumslateblue |
| SCLCS        | Small Cell Lung Cancer Signaling                           | 1.27                    | SUV39H1      | darkorchid      |
| SSP          | Sirtuin Signaling Pathway                                  | 0.799                   | SUV39H1      | fuchsia         |
| VEVEP        | Virus Entry via Endocytic Pathways                         | 1.15                    | FLNB         | deeppink        |

670



671 **Extended Data Table 4: Index Scores for characteristics of PDX models of cancer.**

| Group        | PDX Models |          |          |           |           |          |          |           |          |          |          | Breast   | CRC       | Ovarian  | PDAC |
|--------------|------------|----------|----------|-----------|-----------|----------|----------|-----------|----------|----------|----------|----------|-----------|----------|------|
|              | LCNEC      | Merkel 1 | Merkel 2 | NSCLC     | SCLC 1    | SCLC 2   | SCLC 3   | SCLC 4    | SCLC 5   | SCLC 6   |          |          |           |          |      |
| NE markers   | 2          | 0        | 4        | 1         | 3         | 2        | 1        | 4         | 1        | 3        | 0        | 0        | 3         | 4        |      |
| Cdk5 pathway | 6          | 1        | 1        | 4         | 2         | 3        | 2        | 5         | 1        | 1        | 2        | 0        | 1         | 1        |      |
| Biomarkers   | 8          | 0        | 1        | 6         | 8         | 4        | 3        | 5         | 7        | 4        | 0        | 0        | 8         | 3        |      |
| <b>Total</b> | <b>16</b>  | <b>1</b> | <b>6</b> | <b>11</b> | <b>13</b> | <b>9</b> | <b>6</b> | <b>14</b> | <b>9</b> | <b>8</b> | <b>2</b> | <b>0</b> | <b>12</b> | <b>8</b> |      |

672

673 Models initially classified as NE are shown in white. Models initially classified as non-NE are shown in

674 grey.
